1 **Conserved patterns of somatic mutations in human peripheral blood**  
2 **cells**

3 **L. Alex Liggett<sup>1</sup>, Anchal Sharma<sup>2</sup>, Subhajyoti De<sup>2</sup>, and \*James DeGregori<sup>1,3,4,5</sup>**

4 **<sup>1</sup>Department of Biochemistry and Molecular Genetics, <sup>2</sup>Rutgers Cancer Institute,**  
5 **New Brunswick, NJ 08901, <sup>3</sup>Integrated Department of Immunology, <sup>4</sup>Department of**  
6 **Pediatrics, <sup>5</sup>Department of Medicine, Section of Hematology, University of**  
7 **Colorado School of Medicine, Aurora, CO 80045**

8 **\*Corresponding Author**

9 **Corresponding Author:**

10 **James DeGregori, Ph.D.**

11 [James.DeGregori@ucdenver.edu](mailto:James.DeGregori@ucdenver.edu)

12 **Summary**

13 Mutation accumulation varies across a genome by chromosomal location,  
14 nucleotide identity, surrounding sequence, and chromatin context<sup>1-5</sup>. Nevertheless, while  
15 mutagens, replication machinery, and repair processes exhibit identifiable mutation  
16 signatures, at the tissue or organismal scale the aggregate somatic manifestation of  
17 these processes has been difficult to measure, and often appears to be semi-random.

18 This randomness is often believed to contribute to the stochasticity of diseases like  
19 cancer<sup>6</sup> and physiological decline during aging<sup>7</sup>. The challenge in observing any  
20 tissue-wide somatic mutation patterns is that prior to clonal expansion, most mutations  
21 are rare in healthy tissue<sup>8-11</sup>. Here we describe a new method called FERMI (Fast  
22 Extremely Rare Mutation Identification), which comprehensively captures and quantifies  
23 rare mutations at single DNA molecule resolution that exist at frequencies as rare as  
24  $10^{-4}$  in human peripheral blood. Using this method, we observed an unanticipated  
25 degree of ubiquity and similarity between the somatic mutation loads of different  
26 individuals, where most assayed substitutions are found to occur at conserved  
27 frequencies across nearly all individuals spanning a nine decade age range. These  
28 observed mutational patterns existed both within within non-conserved, non-coding and  
29 non-repetitive regions of the genome and within the coding regions of oncogenes  
30 implicated in hematopoietic malignancies. Furthermore, we find that nucleotides  
31 preferentially mutate to particular bases in a manner that is specified by nucleotide  
32 identity, position, and sequence context. Finally, we identify individuals who deviate from  
33 typical mutational patterns in a reproducible manner that resembles a mild mismatch  
34 repair deficiency, suggesting that variation in somatic mutation rates may be relatively  
35 common. This study provides one of the first estimates of mutation burden in terminally  
36 differentiated somatic cells and demonstrates that somatic mutations in such cells are  
37 significantly more frequent and deterministic than previously believed, and are governed  
38 by mechanisms that when perturbed, result in predictable outcomes.



39 Measuring somatic mutations has been technically challenging because  
40 mutations occur within individual cells that do not necessarily clonally expand to  
41 detectable representation. While these challenges have been somewhat overcome by  
42 increasing the depth of sequencing, using clever methods of barcoding<sup>8</sup> or by  
43 performing paired strand collapsing<sup>12</sup>, it remains difficult to get enough sequencing  
44 depth and breadth while sufficiently limiting false positive noise<sup>8,11,13</sup>. To overcome these  
45 sequencing limitations, we created FERMI, in which we adapted the amplicon  
46 sequencing method of Illumina's TrueSeq Custom Amplicon platform to target only 32 x  
47 150bp genomic regions, spanning AML-associated oncogenic mutations and the Tier III  
48 regions of the human genome (non-conserved, non-protein coding and non-repetitive).  
49 We further improved upon Illumina's capture efficiency to achieve approximately 1.2  
50 million unique captures from 500ng-1µg of genomic DNA (gDNA) (See Methods). The  
51 targeting probes used in gDNA capture were designed with 16bp index of sequence  
52 unique to each individual and a 12bp unique molecular identifier (UMI) of random DNA,  
53 ideally unique to each capture (Fig. 1a). Sequencing reads were sorted both by sample  
54 index and UMI, producing bins of single cell sequencing which were collapsed to  
55 produce relatively error-free consensus reads. Captures were only considered if  
56 supported by at least 5 reads, and variants were only included if identified in both  
57 paired-end sequences, and detected in at least 55% percent of supporting reads (Fig.  
58 1a and Methods; see also Extended Data Figure 1).

59           While all probed regions were successfully captured and amplified, capture  
60 efficiency was variable and dependent on probe identity (Fig 1b). To understand assay  
61 sensitivity, log-series dilutions of human heterozygous single nucleotide polymorphisms  
62 (SNPs) were prepared and assayed by FERMI. Using these dilutions, we observed  
63 robust quantification of diluted SNPs as rare as  $10^{-4}$  (Fig. 1c). Even more accurate  
64 quantifications of SNP frequency can be made when using strand information to follow  
65 dilutions of multiple SNPs located on the same allele (Fig. 1d). For more description of  
66 the accuracy of FERMI, see Elimination of false positive signal in Methods and  
67 Extended Data Figure 1.

68           Using FERMI, we captured and sequenced gDNA from the peripheral blood of 22  
69 apparently healthy donors ranging in age from 0 (cord blood) to 89 years of age  
70 (Extended Data Table 1). Surprisingly, within each of the probed regions, nearly every  
71 position is mutated in at least one individual, including all probed oncogenic mutations,  
72 independent of segment location or individual age, indicating a mutation rate of greater  
73 than 50 per megabase (See Estimation of mutation rate in Methods). While FERMI  
74 could correctly identify individual-specific unique germline SNPs (Extended Data Figure  
75 2a), rare somatic variants are found at remarkably similar allele frequencies across all  
76 sampled ages. The rare allele frequencies are similar enough between most individuals  
77 that comparisons of the variant allele frequencies for each unique substitution falls  
78 along a  $y=x$  line (Fig. 2a). FERMI of biopsies taken 1 month apart from the same  
79 individuals reveal the same germline SNPs (Extended Data Figure 2b), but detected  
80 rare variants are not significantly more similar to each other than to other individuals

81 (Extended Data Figure 2c). Variant allele frequencies (VAFs) were averaged across 22  
82 sampled individuals and used as a comparison to individuals, which appear  
83 age-independent and still adhere to a  $y=x$  line ( $R^2$  Range = 0.426-0.631, Mean = 0.558)  
84 (Fig. 2b), and are similar across experiments (Extended Data Figure 3a-d shows data  
85 from an additional 11 individuals). Variants with frequencies above 0.001 were found in  
86 nearly all samples, while more rare variants were missed with a probability inversely  
87 proportional to their allele frequencies. Furthermore, most variants likely represent  
88 multiple independent events rather than clonal expansions, as they are found at similar  
89 frequencies on both alleles (Extended Data Figure 3e). It thus appears that instead of  
90 being semi-random, the aggregate effect of all DNA damage and maintenance  
91 generates somatic mutations at predictable rates throughout the genome independent  
92 of age. We suspect that such mutations primarily arise in terminally differentiated blood  
93 cell types in a sequence context-dependent manner, without constraints imposed by  
94 developmental lineages and selection, such that it reflects the basal DNA damage and  
95 repair errors in hematopoietic cells.

96 We observed that the overall probability of a substitution occurring is biased by  
97 nucleotide identity, with C>T substitutions being the most common and T>G  
98 substitutions being the least common (Fig. 2c). These biases were largely expected, as  
99 similar patterns have been observed both in other healthy tissues and in cancers<sup>14-18</sup>.  
100 There were notable differences, especially for C>N changes which we observe as  
101 underrepresented within a CpG context (Fig. 2d). Regardless of functional or oncogenic  
102 potential, each site tends to undergo the same substitutions across individuals (Fig. 2e).

103 These conserved substitution rates appear to be deterministic, and cannot be explained  
104 by undersampling (Extended Data Figure 4) or known base change biases (Extended  
105 Data Figure 5). It therefore appears that the combined sources of external and internal  
106 DNA mutation result in systematic substitutions at frequencies that are often predictable  
107 by location and sequence context. Suggestive of differences during cancer evolution  
108 and normal somatic mutation, the integrated exome sequencing pan cancer somatic  
109 mutation data from the TCGA exhibits different substitution patterns from those that we  
110 find in healthy donor blood (Extended Data Figure 6a). Using the trinucleotide contexts  
111 of the substitutions, 7 out of 30 previously identified mutations signatures were  
112 identified, and these signatures did not differ significantly across sampled genomic  
113 segments (Extended Data Figure 6b-c).

114 While we observe variants at conserved frequencies across many individuals,  
115 previous studies have shown that selection for oncogenic changes can increase certain  
116 mutation frequencies with age<sup>17</sup>. While we observe each queried oncogenic change in  
117 every biopsied individual regardless of age, we do not observe significant age-related  
118 changes in the allele frequencies of either oncogenic or non-oncogenic mutations within  
119 proto-oncogenes (Fig. 2f and Extended Data Figure 7). This inability to observe any  
120 clonal expansions with age is most likely due to the fact that the average age of the  
121 individuals within the cohort is 49 years, with only 5 donors older than 70 years.

122 To explore the ability of FERMI to distinguish perturbations of somatic mutation  
123 patterns, gDNA from mismatch repair deficient HCT116 cells (MMR<sup>MT</sup>; hemizygous for  
124 MLH1) was compared to MMR proficient parental cell line gDNA. Substantiating our

125 method, there was a substantial increase in VAFs within the MMR<sup>MT</sup> gDNA when  
126 compared to parental gDNA (Fig. 3a-b). Unexpectedly, while the VAFs for most  
127 peripheral blood samples closely resemble those in other individuals, samples from two  
128 individuals (2 and 19), contained a subset of variants that deviated from the population  
129 averages with approximately a twofold increase in prevalence (Fig. 3c, 3d, and  
130 Extended Data Figure 9). While the magnitude of deviation from mean VAFs was  
131 different, the identities of the deviating variants were the same, such that a comparison  
132 of VAFs between these two individuals correlate more closely to a  $y=x$  line than to the  
133 overall population average (Fig. 3e). This consistent deviation in VAFs for these two  
134 individuals from the averaged population suggests that the mechanisms governing  
135 mutation levels can be systematically perturbed. Surprisingly, the VAF changes in these  
136 two individuals resemble those altered in the MMR<sup>MT</sup> HCT116 cells, though the  
137 magnitude of these changes are greater in the latter (Fig. 3f). Finally, the deviating  
138 variants found within individuals 2 and 19 are not enriched for either oncogenic variants  
139 or for other variants within coding regions (Fig. 3g), indicating that deviations from the  
140 typical variant pattern are not likely the result of selection.

141 As expected from previous studies<sup>19</sup>, the HCT116 MMR<sup>MT</sup> gDNA showed an  
142 increased prevalence of T>C and T>A substitutions when compared to parental gDNA  
143 (Extended Data Figure 8). The samples from individuals #2 and #19 also exhibited  
144 these increased rates of T>C and T>A substitutions, with less extensive increases at C  
145 positions, compared with the average of the 22 individuals (Fig. 3h-i and Extended Data  
146 Figure 9), mirroring the changes observed in MMR<sup>MT</sup> HCT116 cells. Thus, these two



147 individuals appear to present with a mild MMR-like substitution pattern. In support of the  
148 results, individuals #2 and #19 show the same increased rates of substitutions across  
149 multiple experiments (Extended Data Figure 9h-i). Of note, the systematic variance from  
150 the typical mutational pattern for these two individuals and the MMR<sup>MT</sup> HCT116 cells  
151 serves as validation of the specificity of FERMI to accurately detect variants. More  
152 importantly, this finding of two individuals with deviating mutational patterns out of a  
153 sample size of only 22 individuals may be indicative of a broad spectrum of mutational  
154 profiles that exist across the human population.

## 155 **Conclusion**

156 These studies reveal an unprecedented degree of similarity in somatic mutational  
157 patterns across individuals, that most genomic positions are mutated within less than a  
158 million leukocytes, and how mutational spectra can be systematically disrupted in some  
159 individuals. Strikingly, we observed extremely reproducible biases at *each particular*  
160 nucleotide position in terms of the frequency of changes and the base to which it is  
161 changed. These strong position-dependent substitution biases will restrict phenotypic  
162 diversity upon which somatic evolution can act. It appears that mutation incidence, both  
163 non-oncogenic and oncogenic, are relatively well tolerated, highlighting the importance  
164 of evolved tumor suppressive and tissue maintenance mechanisms.

## 165 **Acknowledgments**

166 We would like to thank Ruth Hershberg of Technion University and Jay Hesselberth and  
167 Robert Sclafani of the University of Colorado School of Medicine for useful suggestions  
168 and for review of the manuscript. These studies were supported by grants from the  
169 National Cancer Institute (R01CA180175 to J.D.), NIH/NCATS Colorado CTSI Grant  
170 Number UL1TR001082CU (seed grant to J.D.), F31CA196231 (to L.A.L.), and the Linda  
171 Crnic Institute for Down Syndrome (to J.D. and L.A.L.). The research utilized services of  
172 the Cancer Center Genomics Shared Resource, which is supported in part by NIH grant  
173 P30-CA46934.

174 **Figure 1 | Amplicon sequencing accurately detects mutation allele frequencies as**  
175 **rare as 1/10,000. a**, Graphical depiction of gDNA capture and analysis method. **b**,  
176 Capture efficiencies vary in a probe dependent manner. **c**, Accurate detection of a  
177 single heterozygous SNP in gDNA from one individual diluted into gDNA from another  
178 (without this germline SNP) to frequencies as low as 1/10,000. **d**, Accurate detection of  
179 three linked SNPs found within the same allele diluted as in c. For c and d, error shown  
180 is standard deviation. **e**, ddPCR showing detection of R882H chr2:25457242 C>T  
181 mutation at approximately the expected frequencies in normal human blood.

182 **Figure 2 | Mutations exist at conserved frequencies independently of age. a**,  
183 Comparison of VAFs of identified variants within a 34 year old (x-axis) and 62 year old  
184 (y-axis);  $R^2 = 0.408211$ ,  $p=0.000$ . **b**, VAFs from a 34 year old (x-axis) compared to mean  
185 VAFs from individuals ranging in ages from newborn to 89 years of age ( $n=22$ );  $R^2 =$

186 0.590412,  $p=0.000$ . **c**, Relative contribution rates of each base substitution to all  
187 substitutions identified. **d**, Relative contribution rates of each base substitution  
188 segregated by surrounding 5' and 3' nucleotide context. **e**, All identified base  
189 substitutions within a probed region are plotted by their position and VAFs for individuals  
190 7 and 15 (representative of all other individuals, with greater deviation observed for  
191 individuals 2 and 19 as described below), revealing highly reproducible patterns. **f**,  
192 Oncogenic VAFs plotted as a function of donor age does not reveal evidence of clonal  
193 expansions.

194 **Figure 3 | Individuals Can Systematically Deviate from the Population Average. a**,  
195 Comparing VAFs in HCT116 MMR+ vs MMR<sup>MT</sup> cells reveals an increase in frequencies  
196 for many of the observed variants in MMR<sup>MT</sup> cells ( $R^2 = 0.211479$ ). **b**, MMR<sup>MT</sup> vs mean  
197 VAFs from blood of the 22 individuals shows a similar pattern of increased VAFs as the  
198 comparison with parental HCT116 cells ( $R^2 = 0.120895$ ). **c**, blood from a 73 yr old  
199 person (individual #19) compared to the mean VAFs reveals a deviating population of  
200 variants that exist at an increased frequency compared with average VAFs ( $R^2 =$   
201  $0.387125$ ). **d**, A cord blood sample (individual #2) also shows a subset of variants with  
202 higher frequencies than in the average ( $R^2 = 0.278250$ ). **e**, VAFs from individual #2 vs  
203 individual #19 reveals that the deviating variants are at the same positions, causing the  
204 comparison to fall close to the  $y=x$  line ( $R^2 = 0.613542$ ). **f**, Plotting the mean for VAFs  
205 from individuals #2 and #19 versus VAFs from MMR<sup>MT</sup> HCT116 cells reveals that the  
206 variants within the blood are the same as those found within the MMR<sup>MT</sup> cell line. While

207 variant frequencies are higher in the MMR<sup>MT</sup> cell line, the proportional change for  
 208 different deviating variants are similar ( $R^2 = 0.587474$ ). **g**, Variants detected in  
 209 individuals #2 and #19 are not enriched for oncogenic changes, indicated in blue. **h**,  
 210 Plot of only C>N/G>N variants shows relative similarity between individual #2 and the  
 211 average for all other individuals ( $R^2 = 0.350623$ ). **i**, Plot of only T>N/A>N variants  
 212 reveals that the majority of deviating variants for individual #2 are substitutions affecting  
 213 T or A (R-Squared = 0.040712).

## 214 Methods

### 215 Amplicon Design

216 Amplicon probes for targeted annealing regions were created using the Illumina  
 217 Custom Amplicon DesignStudio (<https://designstudio.illumina.com/>). UMIs were then  
 218 added to the designed probe regions and generated by IDT using machine mixing for  
 219 the randomized DNA. Probes were PAGE purified by IDT. All probes are listed below  
 220 along with binding locations and expected lengths of captured sequence.

| Gene   | Probe Up                        | Probe Down                                 | Probe Start    | Probe End      | Length |
|--------|---------------------------------|--------------------------------------------|----------------|----------------|--------|
| JAK2   | AGTTTACTGACA<br>CCTAGCTGTGATC   | CCATAATTTAAAACC<br>AAATGCTTGTGAGA<br>232 A | chr9:5073733   | chr9:5073887   | 155    |
| TP53-1 | TCATCTTGGGCCTG<br>TGTTATCTCCTA  | ATCCTCACCATCAT<br>CACACTGGAAGAC            | chr17:7577504  | chr17:7577635  | 132    |
| TP53-2 | CCCTCAACAAGATG<br>TTTTGCCAACTG  | ATGAGCGCTGCTCA<br>GATAGCGATGGT             | chr17:7578369  | chr17:7578544  | 176    |
| TP53-3 | GGACAGGTAGGAC<br>CTGATTTCTTACT  | TGTCCTGGGAGAGA<br>CCGGCGCACAGA             | chr17:7577084  | chr17:7577214  | 131    |
| NRAS-1 | CAATAGCATTGCAT<br>TCCCTGTGGTTTT | GTACAGTGCCATGA<br>GAGACCAATACAT            | chr1:115256496 | chr1:115256680 | 185    |
| NRAS-2 | GAAGGTCACACTAG<br>GGTTTTCAATTC  | AAAAGCGCACTGAC<br>AATCCAGCTA               | chr1:115258713 | chr1:115258897 | 185    |
| HRAS   | TCCTTGGCAGGTGG                  | GCAAGAGTGCCTG                              | chr11:534258   | chr1:534385    | 128    |

|        |                                  |                                   |                |                |     |
|--------|----------------------------------|-----------------------------------|----------------|----------------|-----|
|        | GGCAGGAGACCC                     | ACCATCCA                          |                |                |     |
| KRAS-1 | AGGTAAGTGGTGGAG<br>TATTTGATAGTGT | CAAGAGTGCCTTGA<br>CGATACAGCTAATT  | chr12:25398247 | chr12:25398415 | 169 |
| KRAS-2 | GACTGTGTTTCTCC<br>CTTCTCAGGATTC  | TACAGTGCAATGAG<br>GGACCAGTACATG   | chr12:25380242 | chr12:25380368 | 127 |
| TET2-1 | CCATGTTTTGGCTC<br>ATTCATGCTCTTA  | ACGGCCACTCCCCC<br>AATGTCAG        | chr4:106197237 | chr4:106197405 | 169 |
| TET2-2 | CTTTTGAAGAGTG<br>CCACTTGGTGTCT   | GGTGATGGTATCAG<br>GAATGGACTTAGTC  | chr4:106155137 | chr4:106155275 | 139 |
| DNMT3A | TGTGTGGTTAGACG<br>GCTTCCGGGCA    | AGGCAGAGACTGCT<br>GGGCCGGTCA      | chr2:25457211  | chr2:25457364  | 154 |
| IDH1   | CAAATGTGGAAATC<br>ACCAAATGGCACC  | TGGGGATCAAGTAA<br>GTCATGTTGGCA    | chr2:209113077 | chr2:209113239 | 163 |
| IDH2   | GAAGAAGATGTGGA<br>AAAGTCCCAATGG  | CATGGCGACCAGGT<br>AGGCCAGG        | chr15:90631809 | chr15:90631969 | 161 |
| GATA1  | CTTCCAGCCATTTT<br>TGAGATATCCTCA  | CAGCTGCAGCGGT<br>GGCTGTGCT        | chrX:48649667  | chrX:48649849  | 183 |
| SF3B1  | GTGAACATATTCTG<br>CAGTTTGGCTGAA  | ACCATCAGTGCTTT<br>GGCCATTGC       | chr2:198266803 | chr2:198266967 | 165 |
| TIIIA  | CATCTATTCTGTGCT<br>AGGCATTGTGTG  | CAGACCTAGCATCT<br>GTGCCAGAC       | chr1:115227814 | chr1:115227978 | 165 |
| TIIIB  | CAGTCTGGGTTTTG<br>GAGCAATGATATC  | GCAGTGAGCTCAGC<br>CTTGATTTT       | chr2:223190674 | chr2:223190820 | 147 |
| TIIIC  | CCTGGTGCTTAGTC<br>CTGTTCTGAAATT  | AGTCTTCTATAATGC<br>CACAACTGTAT    | chr2:229041101 | chr2:229041289 | 189 |
| TIIID  | GAACAGAACACTTG<br>GTAGTTGACCATG  | AGACAGGGAAGTGG<br>CATGAAGAGTTT    | chr4:110541172 | chr4:110541302 | 131 |
| TIIIE  | GCCTAGAACAGGCA<br>CCATACATTC AAT | AGATGGTGTGCTG<br>TGCCGGATAGGAG    | chr4:112997214 | chr4:112997386 | 173 |
| TIIIF  | TGGCACTATGTGGA<br>GATGTTAGTACAG  | GGATGTTGGTGCTA<br>TCAGTAGCCATA    | chr4:121167756 | chr4:121167884 | 129 |
| TIIIG  | CTCTAGGCTTAGTG<br>GTCAAGGAATGAA  | AGAAGCAGGACTGT<br>GCTTCCAAACAA    | chr4:123547743 | chr4:123547901 | 159 |
| TIIIH  | CTTGGTGGTAGCCT<br>AGGCAGTAATTAA  | CACGTGGTTGGGAA<br>GAGAAAGTG       | chr4:124428637 | chr4:124428767 | 131 |
| TIIIJ  | TTCTATAGCACTGG<br>TGACCAGGACACT  | CTGGCCACAGTGCC<br>TGGTTTCC        | chr11:2126256  | chr11:2126420  | 165 |
| TIIIK  | AGACAGGAGGAAG<br>GAGCAATTCAGAAG  | CATGGAGATCTCGT<br>CCCCTCAGA       | chr11:2389983  | chr11:2390171  | 189 |
| TIIIL  | TAGGCCAGAAAACA<br>CACAGTGTCTGGG  | AACTCCGGTAAGTG<br>GCCGGTGGGGGT    | chr11:2593889  | chr11:2594074  | 186 |
| TIIIM  | ATCTGGGAACAGAC<br>CTTCTCAGGCAT   | GTTCTAAGTTACTCT<br>GTGTACTTGACT   | chr11:11486596 | chr11:11486728 | 133 |
| TIIIN  | AGCCTAGTTACCAT<br>AGACGGATTCAAC  | GAATATCTTCTAACT<br>GGACTTAGAAAACC | chr15:92527052 | chr15:92527176 | 125 |
| TIIIO  | CCAACATGTTCTAA<br>ATTCTGGCCACAG  | TGGGTCTCAGCCAT<br>CCCATTACTG      | chr16:73379656 | chr16:73379832 | 177 |
| TIIIP  | CTAACATCTCACTTC<br>TACCCTACGCTA  | TAAGTGCCCACTAC<br>CCCATCCTTAAT    | chr16:82455026 | chr16:82455164 | 139 |
| TIIIQ  | TCATGACCAGGCC<br>TCCCAGAAGTGGAG  | ATCTGTGAAGCCGG<br>AGTGAAAACAAC    | chr16:85949137 | chr16:85949299 | 163 |

## 484 **Genomic DNA Isolation**

485 Human blood samples were purchased from the Bonfils Blood Center  
486 Headquarters of Denver Colorado. Our use of these samples was determined to be “Not  
487 Human Subjects” by our Institutional Review Board. Biopsies were collected as  
488 unfractionated whole blood from apparently healthy donors, though samples were not  
489 tested for infection. Samples were approximately 10 mL in volume, and collected in BD  
490 Vacutainer spray-coated EDTA tubes. Following collection, samples were stored at 4°C  
491 until processing, which occurred within 5 hours of donation. To remove plasma from the  
492 blood, samples were put in 50 mL conical tubes (Corning #430828) and centrifuged for  
493 10 minutes at 515 rcf. Following centrifugation, plasma was aspirated and 200 mL of  
494 4°C hemolytic buffer (8.3g NH<sub>4</sub>Cl, 1.0g NaHCO<sub>3</sub>, 0.04 Na<sub>2</sub> in 1L ddH<sub>2</sub>O) was added to  
495 the samples and incubated at 4°C for 10 minutes. Hemolyzed cells were centrifuged at  
496 515 rcf for 10 minutes, supernatant was aspirated, and pellet was washed with 200 mL  
497 of 4°C PBS. Washed cells were centrifuged for at 515rcf for 10 minutes, from which  
498 gDNA was extracted using a DNeasy Blood & Tissue Kit (Qiagen REF 69504).

## 499 **Amplicon Capture**

500 For amplicon capture from gDNA, we modified the Illumina protocol called  
501 “Preparing Libraries for Sequencing on the MiSeq” (Illumina Part #15039740 Revision  
502 D). DNA was quantified with a NanoDrop 2000c (ThermoFisher Catalog #ND-2000C).  
503 500ng of input DNA in 15µl was used for each reaction instead of the recommended  
504 quantities. In place of 5µl of Illumina ‘CAT’ amplicons, 5µl of 4500ng/µl of our amplicons

505 were used. During the hybridization reaction, after gDNA and amplicon reaction mixture  
506 was prepared, sealed, and centrifuged as instructed, gDNA was melted for 10 minutes  
507 at 95°C in a heat block (SciGene Hybex Microsample Incubator Catalog #1057-30-O).  
508 Heat block temperature was then set to 60°C, allowed to passively cool from 95°C and  
509 incubated for 24hr. Following incubation, the heat block was set to 40°C and allowed to  
510 passively cool for 1hr. The extension-ligation reaction was prepared using 90 µl of ELM4  
511 master mix per sample and incubated at 37°C for 24hr. PCR amplification was  
512 performed at recommended temperatures and times for 29 cycles. Successful  
513 amplification was confirmed immediately following PCR amplification using a  
514 Bioanalyzer (Agilent Genomics 2200 TapeStation Catalog #G2964-90002, High  
515 Sensitivity D1000 ScreenTape Catalog #5067-5584, High Sensitivity D1000 Reagents  
516 Catalog #5067-5585). PCR cleanup was then performed as described in Illumina's  
517 protocol using 45 µl of AMPure XP beads. Libraries were then normalized for  
518 sequencing using the Illumina KapaBiosystems qPCR kit (KapaBiosystems Reference #  
519 07960336001).

## 520 **Sequencing**

521 Prepared libraries were pooled at a concentration of 5 nM and mixed with PhiX  
522 sequencing control at 5%. Libraries were sequenced on the Illumina HiSeq 4000 at a  
523 density of 12 samples per lane.

## 524 **Bioinformatics**

525           The analysis pipeline used to process sequencing results can be found under  
526 FERMI here: <http://software.laliggett.com/>. For a detailed understanding of each  
527 function provided by the analysis pipeline, refer directly to the software. The overall goal  
528 of the software built for this project is to analyze amplicon captured DNA that is tagged  
529 with equal length UMIs on the 5' and 3' ends of captures, and has been paired-end  
530 sequenced using dual indexes. Input fastq files are either automatically or manually  
531 combined with their paired-end sequencing partners into a single fastq file. Paired reads  
532 are combined by eliminating any base that does not match between Read1 and Read2,  
533 and concatenating this consensus read with the 5' and 3' UMIs. A barcode is then  
534 created for each consensus read from the 5' and 3' UMIs and the first five bases at the  
535 5' end of the consensus. All consensus sequences are then binned together by their  
536 unique barcodes. The threshold for barcode mismatch can be specified when running  
537 the software, and for all data shown in this manuscript one mismatched base was  
538 allowed for a sequence to still count as the same barcode. Bins are then collapsed into  
539 a single consensus read by first removing the 5' and 3' UMIs. Following UMI removal,  
540 consensus sequences are derived by incorporating the most commonly observed  
541 nucleotide at each position so long as the same nucleotide is observed in at least a  
542 specified percent of supporting reads (55% of reads was used for results in this  
543 manuscript) and there are least some minimum number of reads supporting a capture  
544 (5 supporting reads was used for results in this manuscript). Any nucleotide that does  
545 not meet the minimum threshold for read support is not added to the consensus read,  
546 and alignment is attempted with an unknown base at that position. From this set of



547 consensus reads, experimental quality measurements are made, such as total captures,  
548 total sequencing reads, average capture coverage, and estimated error rates. Derived  
549 consensus reads are then aligned to the specified reference genome using  
550 Burrows-Wheeler<sup>20</sup>, and indexed using SAMtools<sup>21</sup>. For this manuscript consensus  
551 reads were aligned to the human reference genome hg19<sup>22,23</sup> (though the software  
552 should be compatible with other reference genomes). Sequencing alignments are then  
553 used to call variants using the Bayesian haplotype-based variant detector, FreeBayes<sup>24</sup>.  
554 Identified variants are then decomposed and block decomposed using the variant  
555 toolset vt<sup>25</sup>. Variants are then filtered to eliminate any that have been identified outside  
556 of probed genomic regions. If necessary variants can also be eliminated if below certain  
557 coverage or observation thresholds such that variants must be independently observed  
558 multiple times in different captures to be included. For this manuscript, we included all  
559 variants that passed previous filters and did not eliminate those that were observed only  
560 within a single capture, unless otherwise indicated.

### 561 **Elimination of false positive signal**

562 A number of steps have been included within sample preparation and  
563 bioinformatics analysis specifically to distinguish between true positive signal and false  
564 positive signal. Using the dilution series shown in Figs. 1c-d we can show sufficient  
565 sensitivity to identify signal diluted to levels as rare as  $10^{-4}$ . While these dilutions show  
566 significantly improved sensitivity over many current sequencing methods, they do not  
567 address our background error rate. Unfortunately, because both endogenous and

568 exogenous DNA synthesis is error prone, it is challenging to find negative controls that  
569 can be used to estimate background error rates with a method of mutation detection as  
570 putatively sensitive as FERMI. Nevertheless, we have a number of steps that should  
571 eliminate most sources of false signal. The two largest sources of erroneous mutation  
572 when sequencing DNA will typically be from PCR amplification mutations (caused both  
573 by polymerase errors and exogenous insults like oxidative damage), and sequencing  
574 errors.

575 The steps are the following:

- 576 ● *Elimination of first round PCR amplification errors*
- 577 ● *Elimination of subsequent PCR amplification errors*
- 578 ● *Elimination of sequencing errors*

579 *Elimination of first round PCR amplification errors*

580 The first round of PCR amplification performed during library preparation causes  
581 mutations that are challenging to distinguish from those that occurred endogenously.  
582 Since there is little difference between those mutations that occur during the first round  
583 of PCR amplification and those that occurred endogenously, we rely on probability to  
584 eliminate these errors. Since we are performing single-cell sequencing, we can require  
585 that a mutation be observed in multiple cells before it is called as a true positive signal.  
586 As we expect about 400 first round PCR amplification errors, the probability that the  
587 identical mutation will occur in multiple cells becomes exponentially unlikely (Extended

588 Data Figure 1). By requiring a mutation be observed in just three cells before it is called  
589 as real signal, only about 1-2 first round PCR amplification errors should ever make it  
590 into the final data. When we process our data requiring up to 5 independent  
591 observations of a mutation, the overall mutation spectrum does not change, apart from  
592 a loss of the most rarely observed variants. This observation led us to include all  
593 variants that were observed even once. Our logic is that while about 400 variants will be  
594 the result of the first round of PCR amplification, these same variants are already  
595 occurring endogenously, meaning that absolute variant allele frequency accuracy will  
596 be affected, but not the identities of variants.

#### 597 *Elimination of subsequent PCR amplification errors*

598 Elimination of PCR amplification errors after the first round of PCR is done using  
599 UMI collapsing (Fig. 1a). Each time a strand is amplified, the UMI will keep track of its  
600 identity. Any mutations that occur after the first round of PCR will be found in 25% of the  
601 reads or fewer. This allows us to collapse each unique capture and eliminate any rarely  
602 observed variants associated with a given UMI. Utilizing the UMI in this way allows us to  
603 essentially eliminate any PCR amplification errors that occurred after the first round of  
604 PCR.

#### 605 *Elimination of sequencing errors*

606 Sequencing errors are eliminated in two ways. This first method is by using  
607 paired-end sequencing to sequence the same fragment of DNA twice (Fig. 1a). The

608 information found within each of these reads (Read1 and Read2) should theoretically be  
609 the same, meaning that unless the same sequencing error is made at the same locus  
610 within both Read1 and Read2, the two strands will differ. Any differences are simply  
611 eliminated from the data as it is unknown which base call is correct, and the rest of the  
612 data is included in the analysis. This collapsing should eliminate most sequencing  
613 errors, though it will sequencing errors of the same identity occurring at the same locus.  
614 These errors are removed when collapsing into single cell bins (Fig. 1a). As with the  
615 logic when eliminating subsequent PCR amplification errors, all sequence associated  
616 with each UMI should be identical. Therefore, sequencing errors passing through Read1  
617 and Read2 will not match other sequenced strands from the same capture event, and  
618 are eliminated during consensus sequence derivation.

### 619 **Mutation signature analysis**

620 20 somatic mutation signatures were previously identified<sup>15</sup> by analyzing  
621 trinucleotide mutation context of cancer genomes using non-negative matrix  
622 factorization (NMF) and principal component analysis (PCA). Here, we used  
623 deconstructSig<sup>26</sup> to identify the relative presence of those mutation signatures within the  
624 somatic mutations detected blood using somaticSignatures<sup>27</sup>. Codon triplet biases were  
625 analyzed using the MutationalPatterns R package<sup>28</sup>.

### 626 **Estimation of mutation rate**

627 It is difficult to understand the somatic lineage development that gave rise to the  
628 number of cells that are assayed from each blood biopsy. So estimating a somatic  
629 mutation rate is challenging. Nevertheless we can estimate what somatic mutation rates  
630 might be assuming the number of cells that were assayed contained all unique variants  
631 or not.

632 An upper bound for the somatic mutation rate observed by FERMI analysis can  
633 be estimated by using the number of captures and total observed variants, and assume  
634 that all of these are de-novo mutations. In our data we observe about 1232458 unique  
635 captures per analyzed blood sample. These captures are relatively uniformly spread  
636 across each of our 32 different probes which span a total of 4838bp. From this the total  
637 probed DNA,  $D_T$ , can be estimated as:

$$638 \quad D_T = \frac{1232458 \text{ captures} * 4838 \text{ bp}}{32 \text{ probes}}$$

$$639 \quad D_T = 186332243.9 \text{ bp}$$

640 The total number of observed observed variants within each blood sample is  
641 approximately 168940, from which the aggregate mutation rate,  $M$ , can be estimated as:

$$642 \quad M = \frac{168940 \text{ mutations}}{186332243.9 \text{ bp}}$$

$$643 \quad M = 9 * 10^{-4} \text{ mut/bp}$$

$$644 \quad M = 900 \text{ mut/Mb}$$

645 A lower estimate can be made by assuming that mutations are not all unique  
646 occurrences but might be the result of clonal expansions creating many copies of each  
647 mutation. This mutation rate,  $M$ , can be roughly estimated by the approximately 40000  
648 captures per each of the 32 probes that captured roughly 6000 variants across a

649 conservative 100bp sized capture for each probe (probe region is realistically smaller  
650 than 150bp because of collapsing conditions).

$$651 \quad M = \frac{6000 \text{ variants/sample}}{40000 \text{ captures} * 32 \text{ probes} * 100 \text{ bp/probe}}$$

$$652 \quad M = 5 * 10^{-5} \text{ mut/bp}$$

$$653 \quad M = 50 \text{ mut/Mb}$$

- 654 1. Benzer, S. ON THE TOPOGRAPHY OF THE GENETIC FINE STRUCTURE. *Proc.*  
655 *Natl. Acad. Sci. U. S. A.* **47**, 403–415 (1961).
- 656 2. Gaffney, D. J. & Keightley, P. D. The scale of mutational variation in the murid  
657 genome. *Genome Res.* **15**, 1086–1094 (2005).
- 658 3. Lercher, M. J., Williams, E. J. B. & Hurst, L. D. Local similarity in evolutionary rates  
659 extends over whole chromosomes in human-rodent and mouse-rat comparisons:  
660 implications for understanding the mechanistic basis of the male mutation bias. *Mol.*  
661 *Biol. Evol.* **18**, 2032–2039 (2001).
- 662 4. Nachman, M. W. & Crowell, S. L. Estimate of the mutation rate per nucleotide in  
663 humans. *Genetics* **156**, 297–304 (2000).
- 664 5. Hwang, D. G. & Green, P. Bayesian Markov chain Monte Carlo sequence analysis  
665 reveals varying neutral substitution patterns in mammalian evolution. *Proc. Natl.*  
666 *Acad. Sci. U. S. A.* **101**, 13994–14001 (2004).
- 667 6. Tomasetti, C., Li, L. & Vogelstein, B. Stem cell divisions, somatic mutations, cancer  
668 etiology, and cancer prevention. *Science* **355**, 1330–1334 (2017).
- 669 7. Kujoth, G. C. *et al.* Mitochondrial DNA mutations, oxidative stress, and apoptosis in  
670 mammalian aging. *Science* **309**, 481–484 (2005).
- 671 8. Hiatt, J. B., Pritchard, C. C., Salipante, S. J., O’Roak, B. J. & Shendure, J. Single  
672 molecule molecular inversion probes for targeted, high-accuracy detection of  
673 low-frequency variation. *Genome Res.* **23**, 843–854 (2013).
- 674 9. Preston, J. L. *et al.* High-specificity detection of rare alleles with Paired-End Low  
675 Error Sequencing (PELE-Seq). *BMC Genomics* **17**, 464 (2016).

- 676 10. Zhang, T.-H., Wu, N. C. & Sun, R. A benchmark study on error-correction by  
677 read-pairing and tag-clustering in amplicon-based deep sequencing. *BMC Genomics*  
678 1–9 (2016).
- 679 11. Schmitt, M. W. *et al.* Sequencing small genomic targets with high efficiency and  
680 extreme accuracy. *Nat. Methods* 1–4 (2015).
- 681 12. Kennedy, S. R. *et al.* Detecting ultralow-frequency mutations by Duplex Sequencing.  
682 *Nat. Protoc.* **9**, 2586–2606 (2014).
- 683 13. Chen, L., Liu, P., Evans, T. C., Jr & Ettwiller, L. M. DNA damage is a pervasive cause  
684 of sequencing errors, directly confounding variant identification. *Science* **355**,  
685 752–756 (2017).
- 686 14. Blokzijl, F. *et al.* Tissue-specific mutation accumulation in human adult stem cells  
687 during life. *Nature* **538**, 260–264 (2016).
- 688 15. Alexandrov, L. B. *et al.* Signatures of mutational processes in human cancer. *Nature*  
689 **500**, 415–421 (2013).
- 690 16. Alexandrov, L. B. *et al.* Mutational signatures associated with tobacco smoking in  
691 human cancer. *Science* **354**, 618–622 (2016).
- 692 17. Jaiswal, S. *et al.* Age-Related Clonal Hematopoiesis Associated with Adverse  
693 Outcomes. *N. Engl. J. Med.* 1–11 (2014).
- 694 18. Martincorena, I. *et al.* Tumor evolution. High burden and pervasive positive selection  
695 of somatic mutations in normal human skin. *Science* **348**, 880–886 (2015).
- 696 19. Zhao, H. *et al.* Mismatch repair deficiency endows tumors with a unique mutation  
697 signature and sensitivity to DNA double-strand breaks. *eLife Sciences* **3**, e02725



- 698 (2014).
- 699 20. Li, H. & Durbin, R. Fast and accurate short read alignment with Burrows–Wheeler  
700 transform. *Bioinformatics* **25**, 1754–1760 (2009).
- 701 21. Li, H. *et al.* The Sequence Alignment/Map format and SAMtools. *Bioinformatics* **25**,  
702 2078–2079 (2009).
- 703 22. Lander, E. S. *et al.* Initial sequencing and analysis of the human genome. *Nature*  
704 **409**, 860–921 (2001).
- 705 23. Fujita, P. A. *et al.* The UCSC genome browser database: update 2011. *Nucleic Acids*  
706 *Res.* **39**, D876–D882 (2010).
- 707 24. Garrison, E. & Marth, G. Haplotype-based variant detection from short-read  
708 sequencing. *arXiv [q-bio.GN]* (2012).
- 709 25. Tan, A., Abecasis, G. R. & Kang, H. M. Unified representation of genetic variants.  
710 *Bioinformatics* **31**, 2202–2204 (2015).
- 711 26. Rosenthal, R., McGranahan, N., Herrero, J., Taylor, B. S. & Swanton, C.  
712 DeconstructSigs: delineating mutational processes in single tumors distinguishes  
713 DNA repair deficiencies and patterns of carcinoma evolution. *Genome Biol.* **17**, 31  
714 (2016).
- 715 27. Gehring, J. S., Fischer, B., Lawrence, M. & Huber, W. SomaticSignatures: inferring  
716 mutational signatures from single-nucleotide variants. *Bioinformatics* **31**, 3673–3675  
717 (2015).
- 718 28. Blokzijl, F., Janssen, R., Van Boxtel, R. & Cuppen, E. MutationalPatterns: an  
719 integrative R package for studying patterns in base substitution catalogues. *bioRxiv*

720 071761 (2016). doi:10.1101/071761

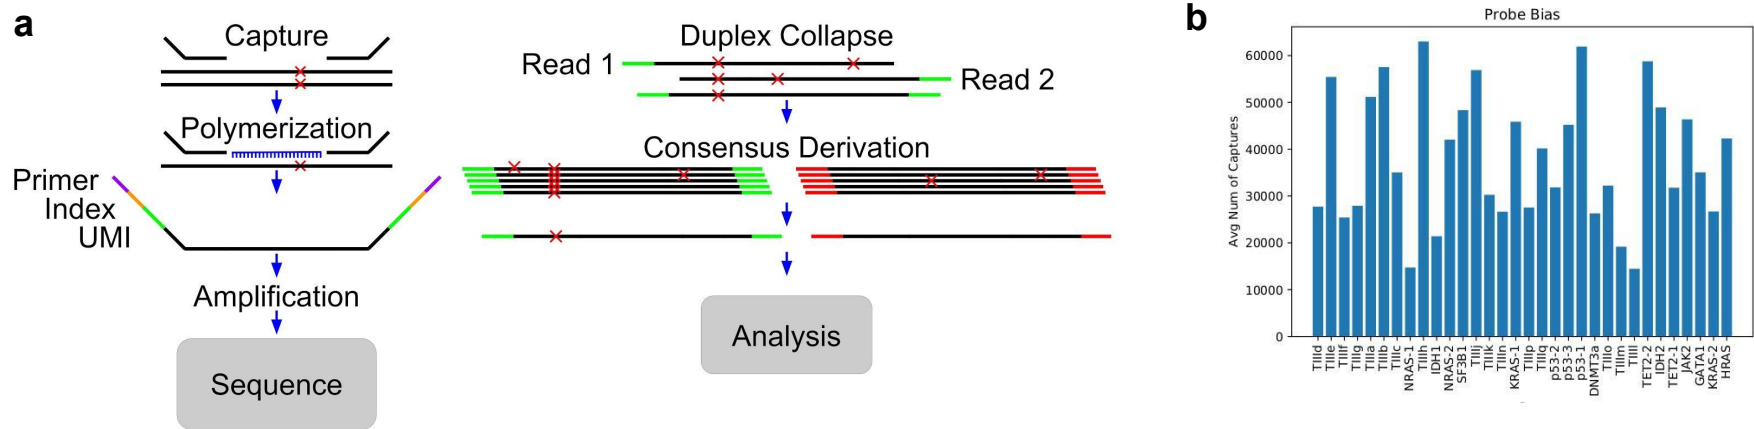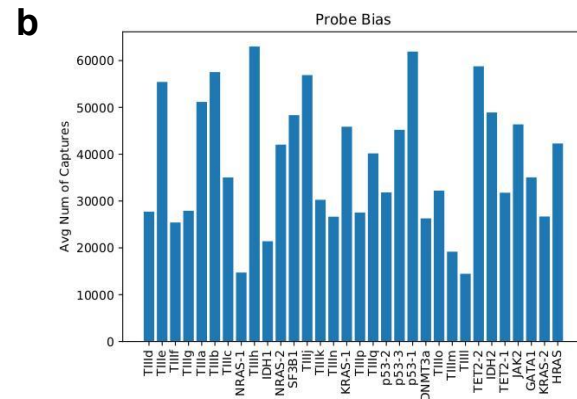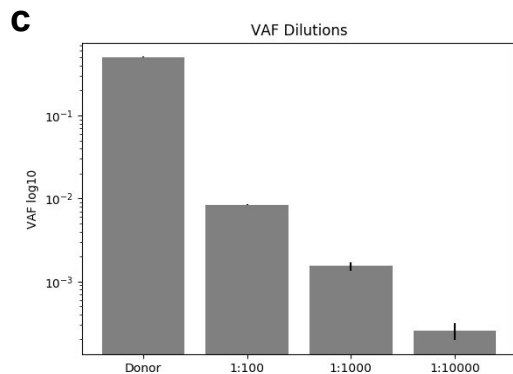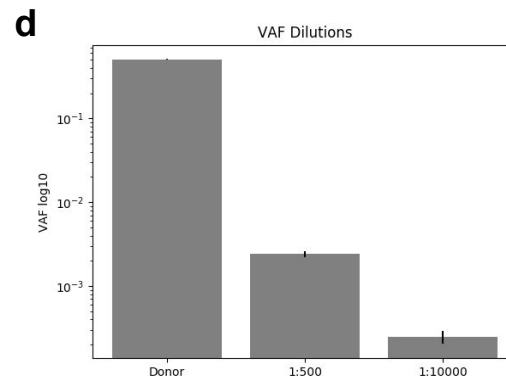

**Figure 1 | Amplicon sequencing accurately detects mutation allele frequencies as rare as 1/10,000.** **a**, Graphical depiction of gDNA capture and analysis method. **b**, Capture efficiencies vary in a probe dependent manner. **c**, Accurate detection of a single heterozygous SNP in gDNA from one individual diluted into gDNA from another (without this germline SNP) to frequencies as low as 1/10,000. **d**, Accurate detection of three linked SNPs found within the same allele diluted as in **c**. Error shown is standard deviation.

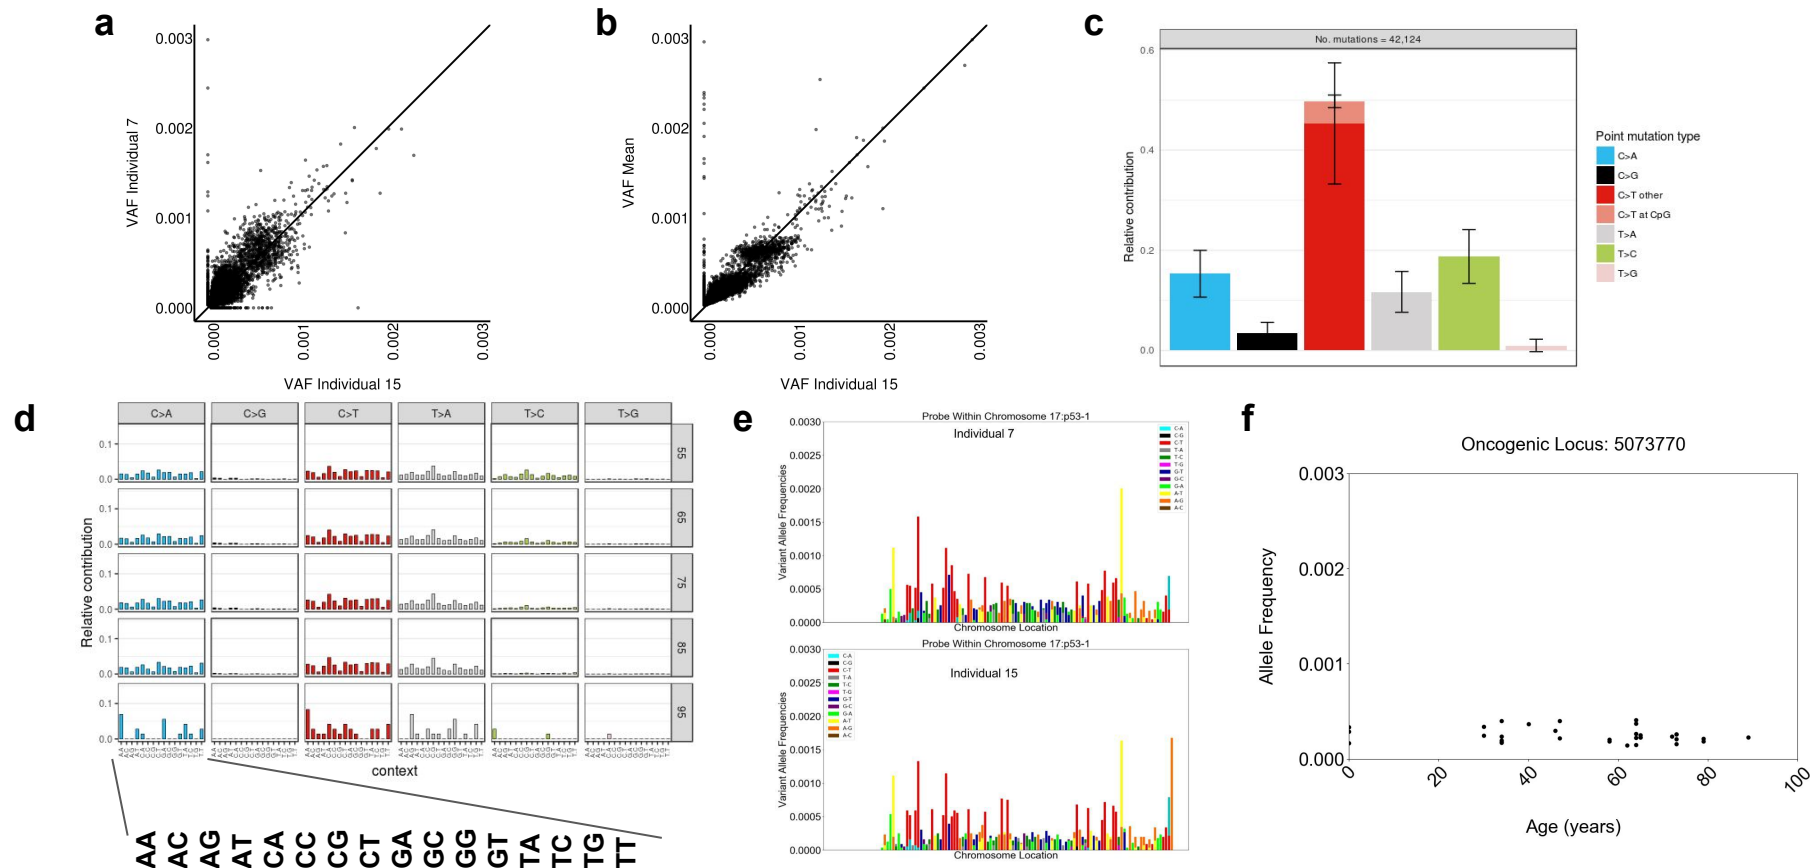

**Figure 2 | Mutations exist at conserved frequencies independently of age.** **a**, Comparison of VAFs of identified variants within a 34 year old (x-axis) and 62 year old (y-axis);  $R^2 = 0.408211$ ,  $p=0.000$ . **b**, VAFs from a 34 year old (x-axis) compared to mean VAFs from individuals ranging in ages from newborn to 89 years of age ( $n=22$ );  $R$ -Squared =  $0.590412$ ,  $p=0.000$ . **c**, Relative contribution rates of each base substitution to all substitutions identified. **d**, Relative contribution rates of each base substitution identified by surrounding 5' and 3' nucleotide context. **e**, All identified base substitutions within a probed region are plotted by their position and VAFs for individuals 7 and 15 (representative of most other individuals), revealing highly reproducible patterns. **f**, Oncogenic VAFs plotted as a function of donor age show little evidence of clonal expansion.

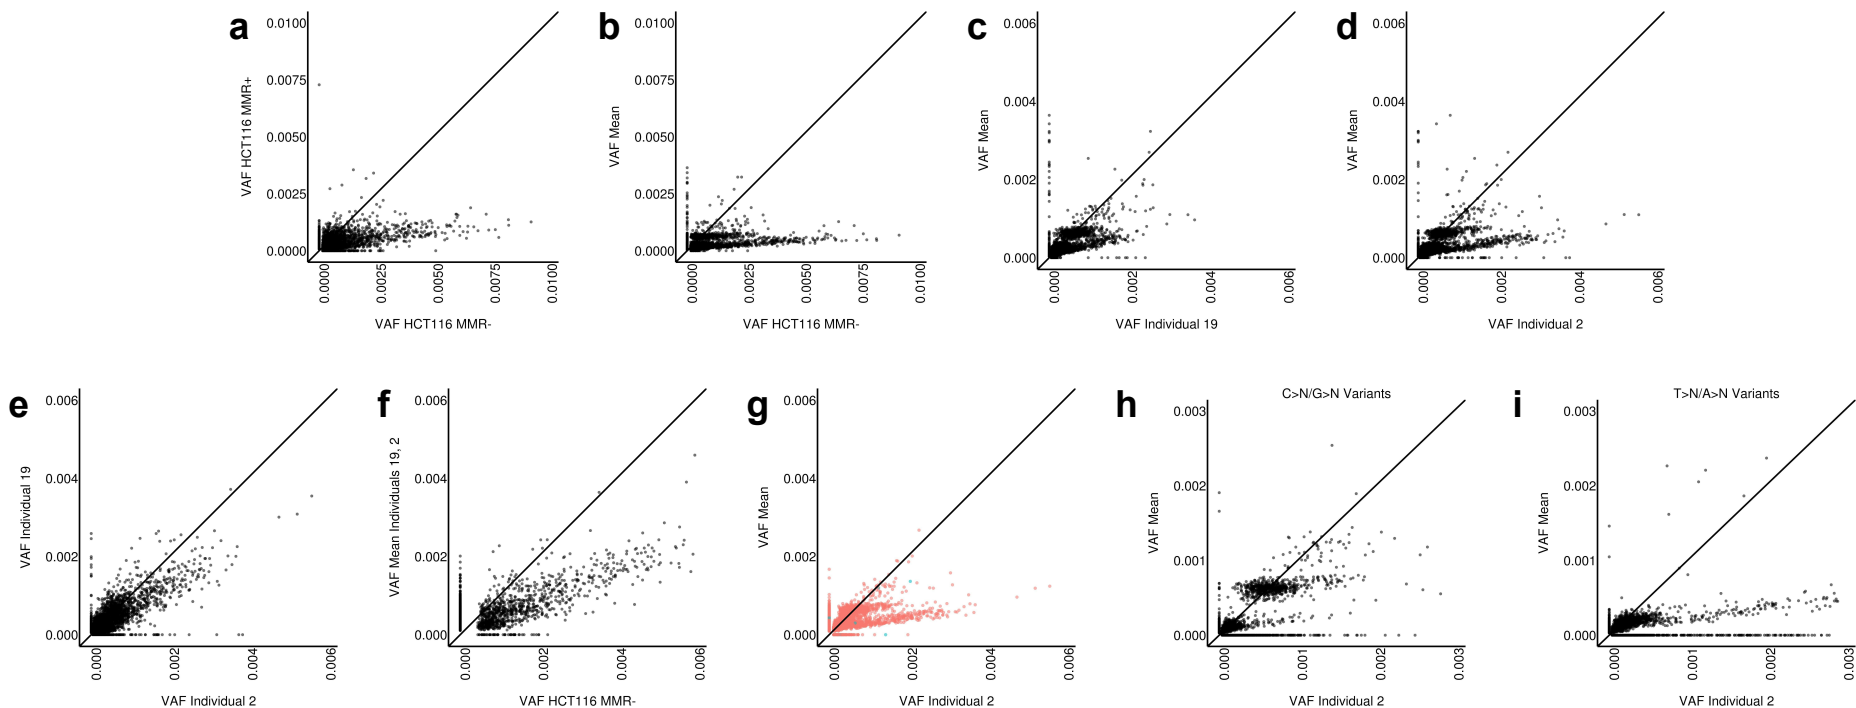

**Figure 3 | Individuals Can Systematically Deviate from Population Average.** **a**, Comparing VAFs in HCT116 MMR+ vs MMR<sup>MT</sup> cells reveals an increase in frequencies for many of the observed variants in MMR<sup>MT</sup> cells (R-Squared = 0.211479). **b**, MMR<sup>MT</sup> vs mean VAFs from blood of the 22 individuals shows a similar pattern of increased VAFs as the comparison with parental (R-Squared = 0.120895). **c**, blood from a 73 yr old person (individual #19) compared to the mean VAFs reveals a deviating population of variants that exist at an increased frequency compared with average VAFs (R-Squared = 0.387125). **d**, A cord blood sample (individual #2) also shows a subset of variants with higher frequencies than in the average (R-Squared = 0.278250). **e**, VAFs from individual #2 vs individual #19 reveals that the deviating variants are at the same positions causing the comparison to fall close to the y=x line (R-Squared = 0.613542). **f**, Plotting the mean for VAFs from individuals #2 and #19 versus VAFs from MMR<sup>MT</sup> HCT116 cells reveals that the variants within the blood are the same as those found within the MMR<sup>MT</sup> cell line. While variant frequencies are higher in the MMR<sup>MT</sup> cell line, the identities of the deviating variants are the same (R-Squared = 0.587474). **g**, Variants detected in individuals #2 and #19 are not enriched for oncogenic changes, indicated in blue **h**, Plot of only C>N/G>N variants shows relative similarity between MMR- and parental cells (R-Squared = 0.350623). **i**, Plot of only T>N/A>N variants reveals that the majority of deviating variants between MMR<sup>MT</sup> and parental cells are substitutions affecting T or A.

# Extended Data Figure 1

**a**

| Supporting Captures | Duplex | Mock-Duplex | % Vars Eliminated |
|---------------------|--------|-------------|-------------------|
| 4                   | 4240   | 4264        | 0.56285           |
| 3                   | 4912   | 4928        | 0.32468           |
| 2                   | 5704   | 5734        | 0.52319           |
| 1                   | 6760   | 6794        | 0.50044           |

**b**

| Enzyme            | Error Rate (mut/base) | Unique UMIs | Captures per UMI | Total Amplicon Size | # Bases In First Amplification | Total Errors |
|-------------------|-----------------------|-------------|------------------|---------------------|--------------------------------|--------------|
| Phusion HF Buffer | 0.00000044            | 2818388     | 88075            | 4838                | 426105036                      | 187          |
| Phusion GC Buffer | 0.00000095            | 2818388     | 88075            | 4838                | 426105036                      | 405          |

**c**

| Supporting Captures | 1      | 2     | 3    | 4    | 5    |
|---------------------|--------|-------|------|------|------|
|                     | 187.49 | 7.27  | 0.28 | 0.01 | 0.00 |
|                     | 404.80 | 33.87 | 2.83 | 0.24 | 0.02 |

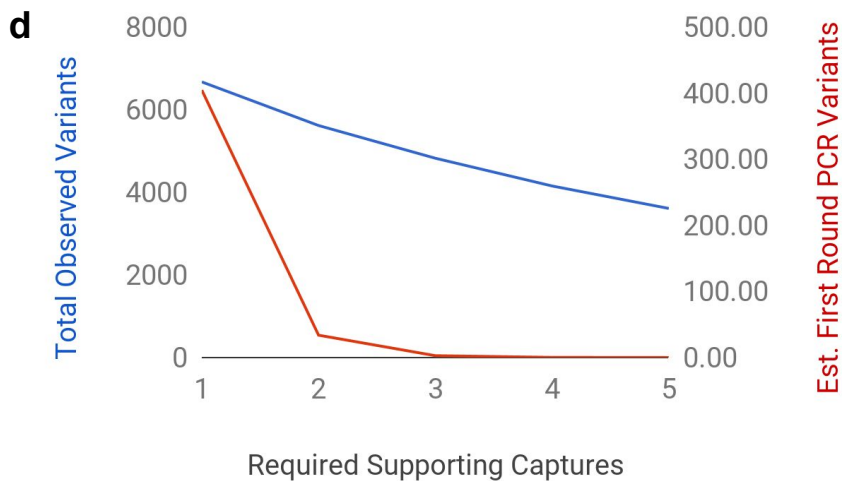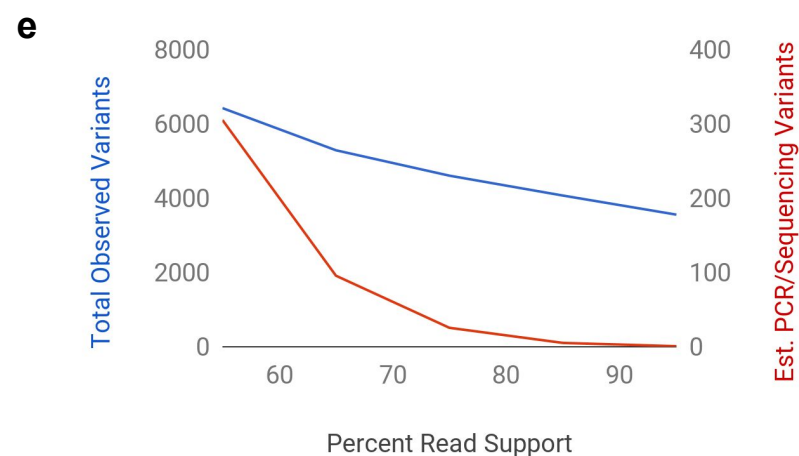

# Extended Data Table 1

## Cohort 1

**a**

| Individual | Age (years) |
|------------|-------------|
| 1          | 0           |
| 2          | 0           |
| 3          | 0           |
| 4          | 34          |
| 5          | 34          |
| 6          | 30          |
| 7          | 34          |
| 8          | 46          |
| 9          | 47          |
| 10         | 40          |
| 11         | 59          |
| 12         | 59          |
| 13         | 58          |
| 14         | 62          |
| 15         | 65          |
| 16         | 64          |
| 17         | 64          |
| 18         | 73          |
| 19         | 73          |
| 20         | 72          |
| 21         | 79          |
| 22         | 89          |

## Cohort 2

**b**

| Individual | Age (years) |
|------------|-------------|
| 25         | 0           |
| 26         | 34          |
| 27         | 44          |
| 28         | 43          |
| 29         | 46          |
| 30         | 44          |
| 31         | 46          |
| 32         | 49          |
| 33         | 41          |
| 34         | 57          |
| 35         | 62          |

## Extended Data Figure 2

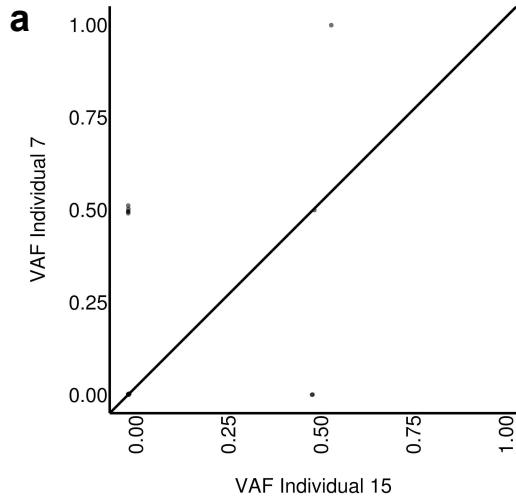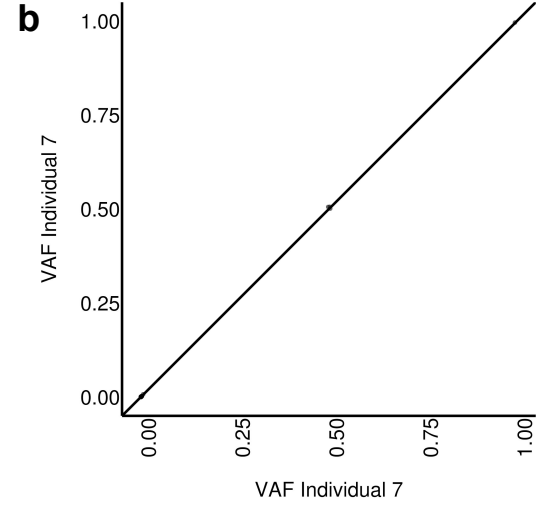

**c**

| Individual   | 0mo vs 1mo |
|--------------|------------|
| Individual A | 0.460348   |
| Individual B | 0.538478   |
| Individual C | 0.436766   |
| Individual D | 0.522387   |
| Individual E | 0.519219   |
| Individual F | 0.482805   |



# Extended Data Figure 3

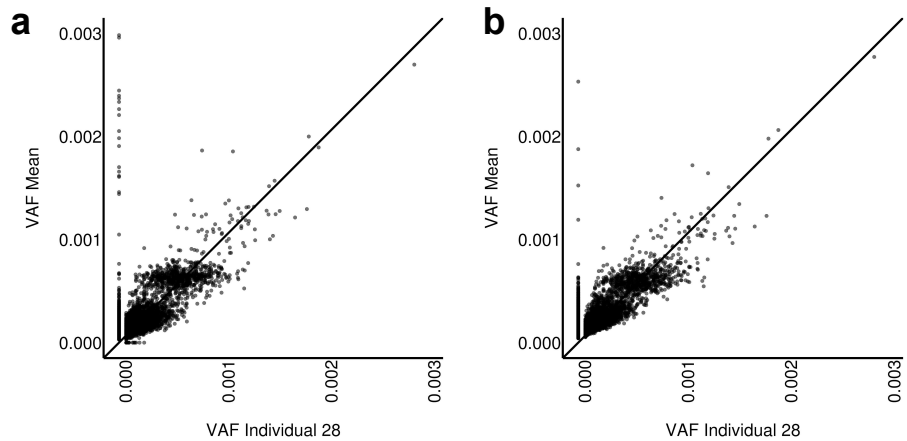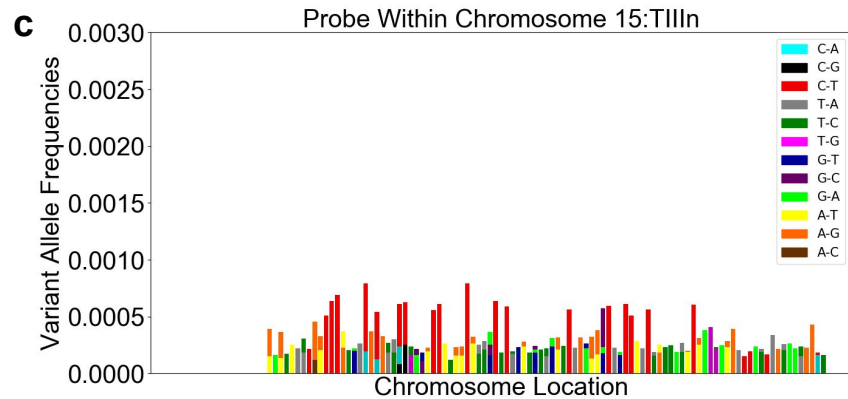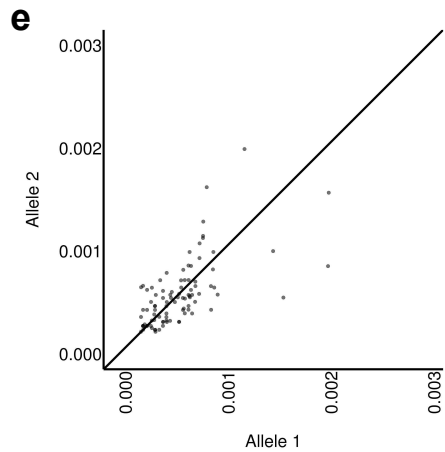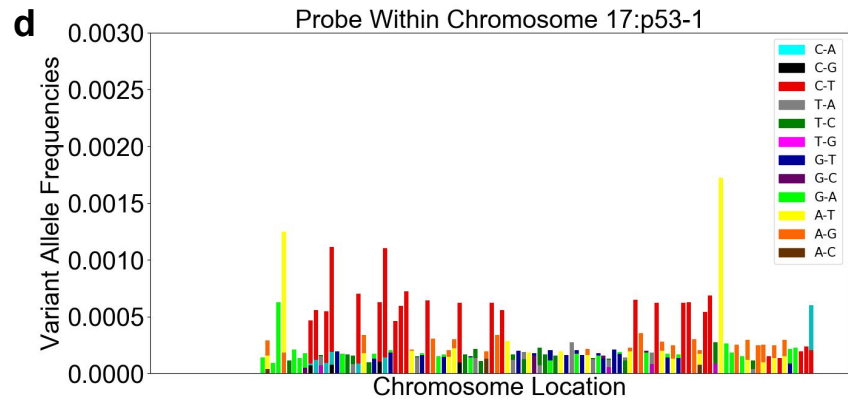

# Extended Data Figure 4

**a**

**Trinucleotide Representation Probed Region**

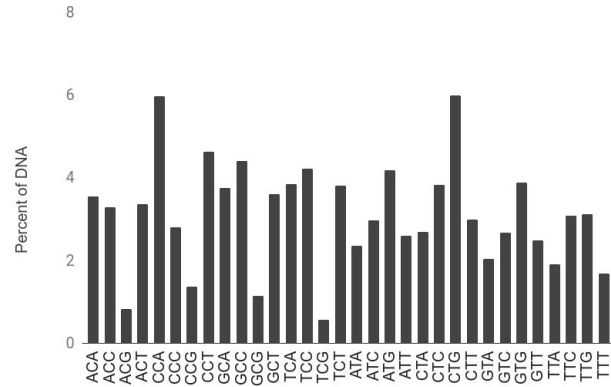

**b**

**Trinucleotide Representation Human Genome**

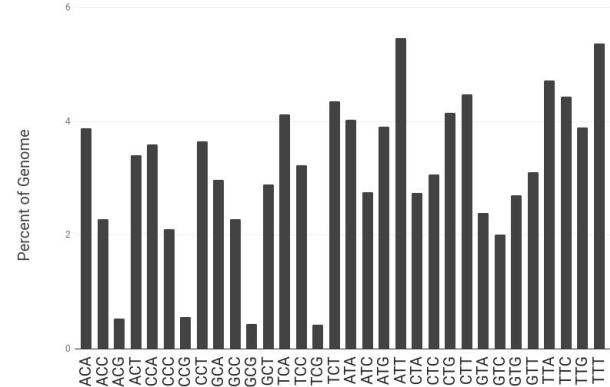

**c**

**Trinucleotide Representation (Probed Region/hg19)**

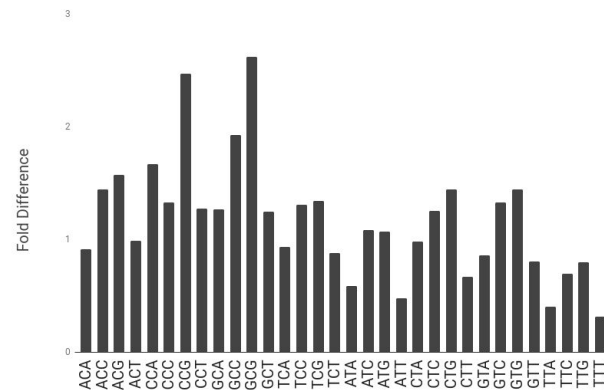

# Extended Data Figure 5

## A

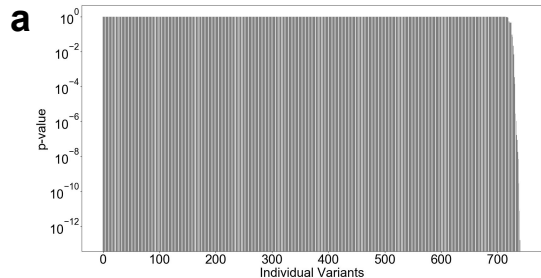

## C

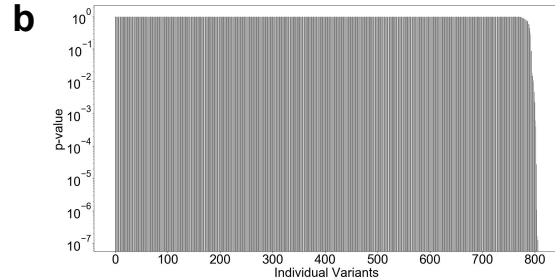

## G

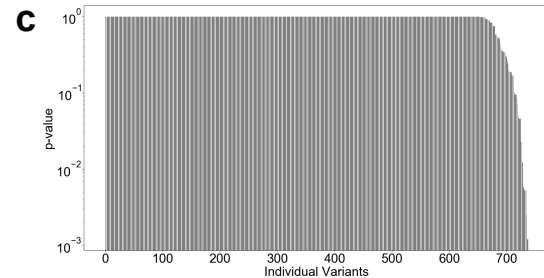

## T

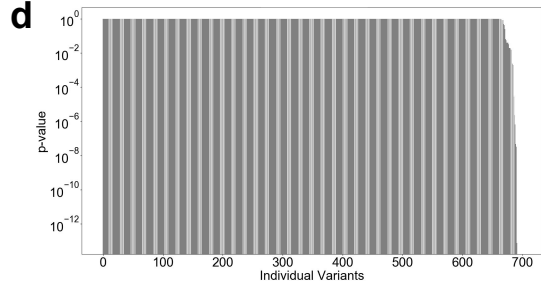

## A

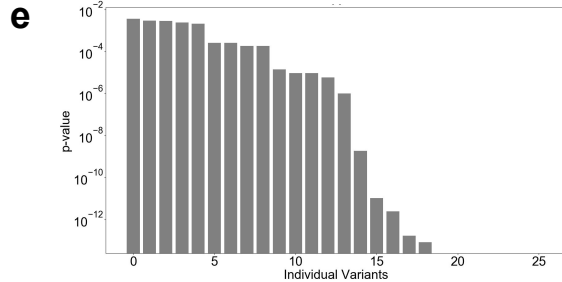

## C

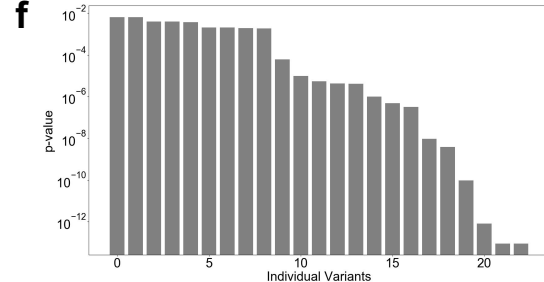

## G

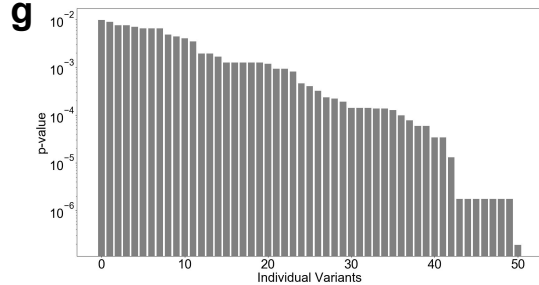

## T

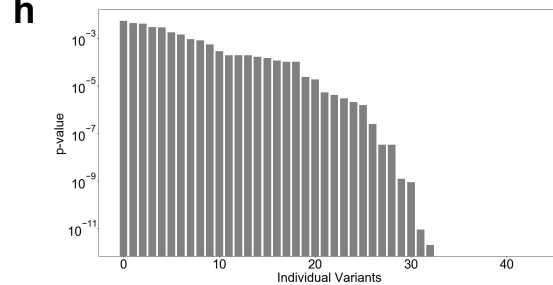

# Extended Data Figure 6

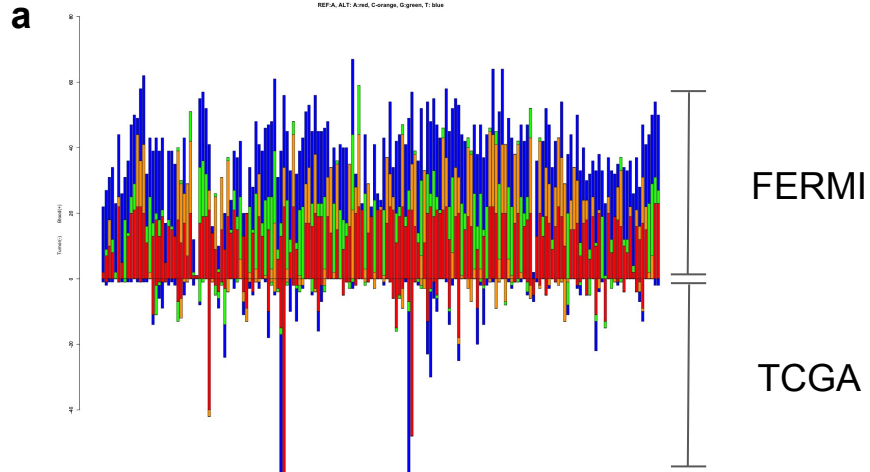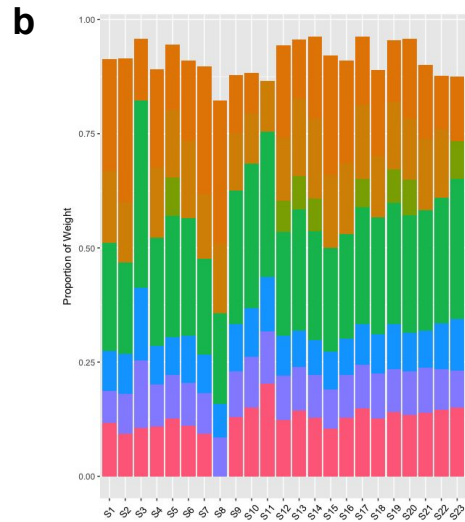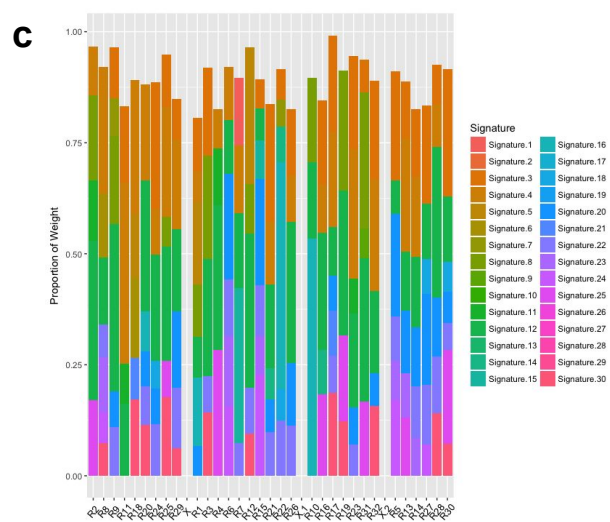

# Extended Data Figure 7

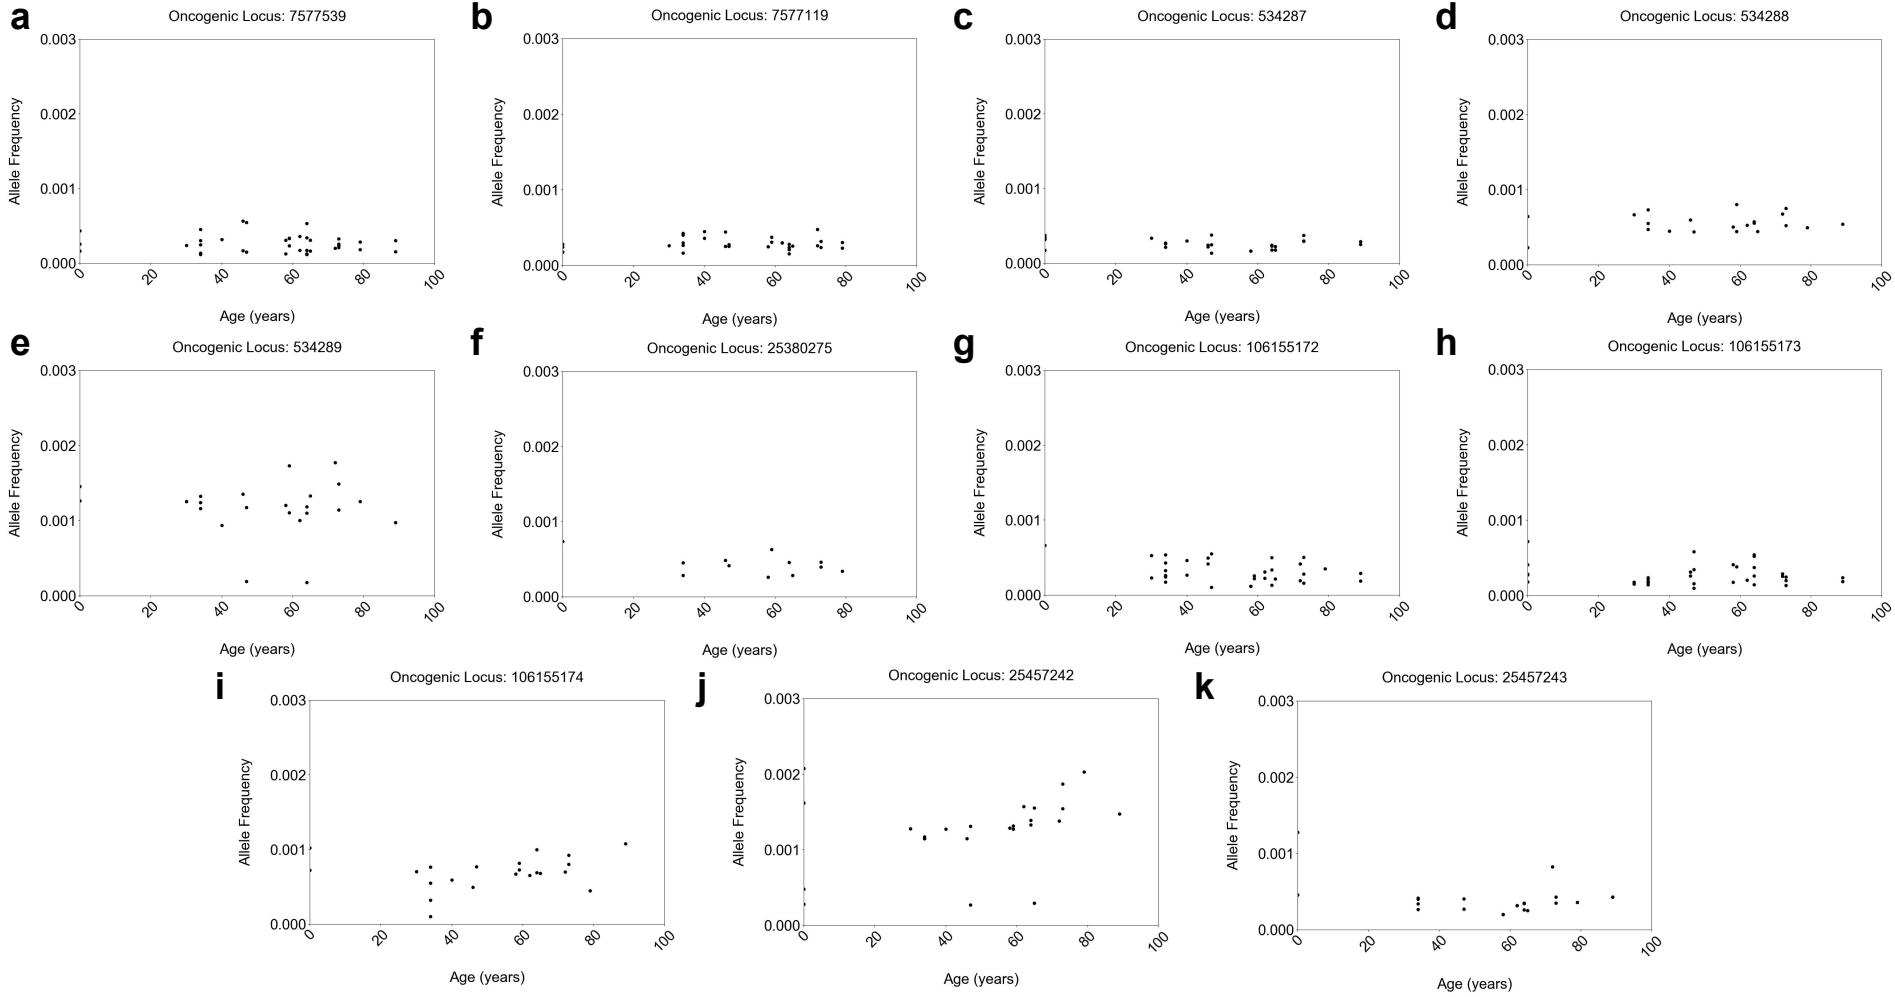

# Extended Data Figure 8

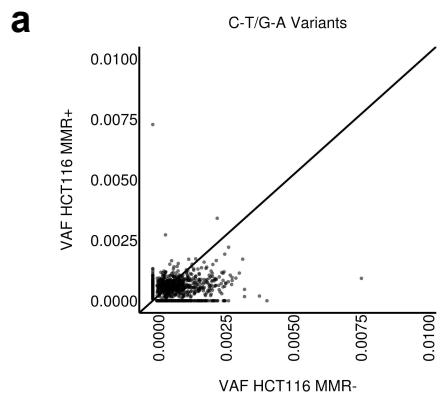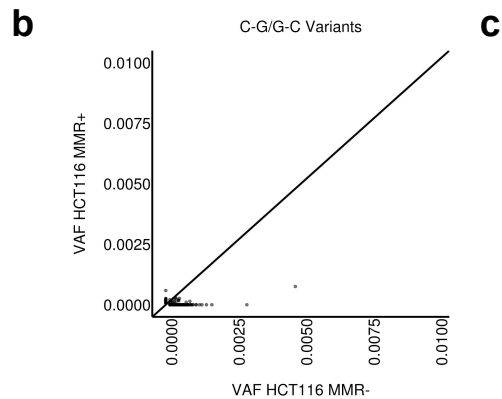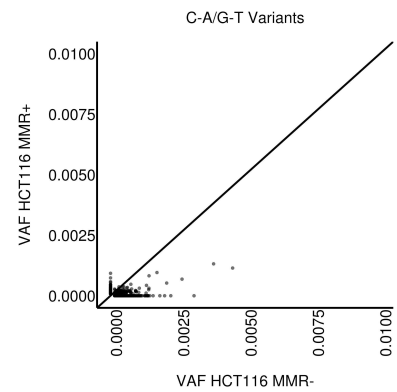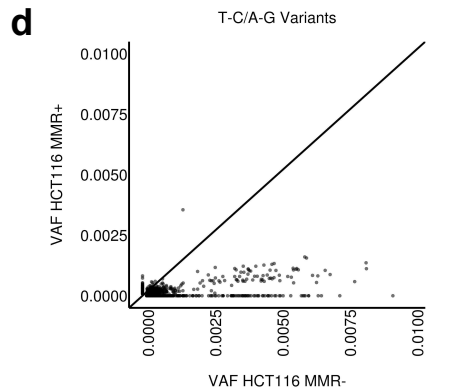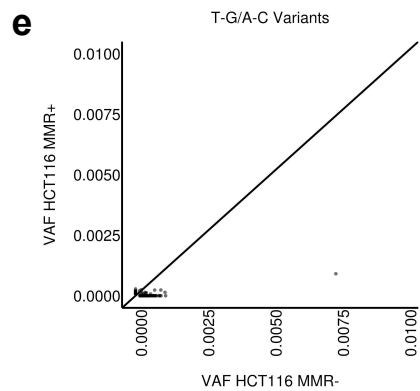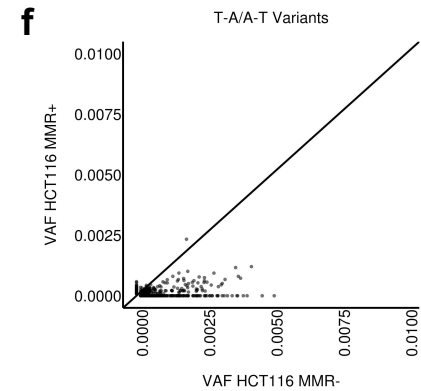

# Extended Data Figure 9

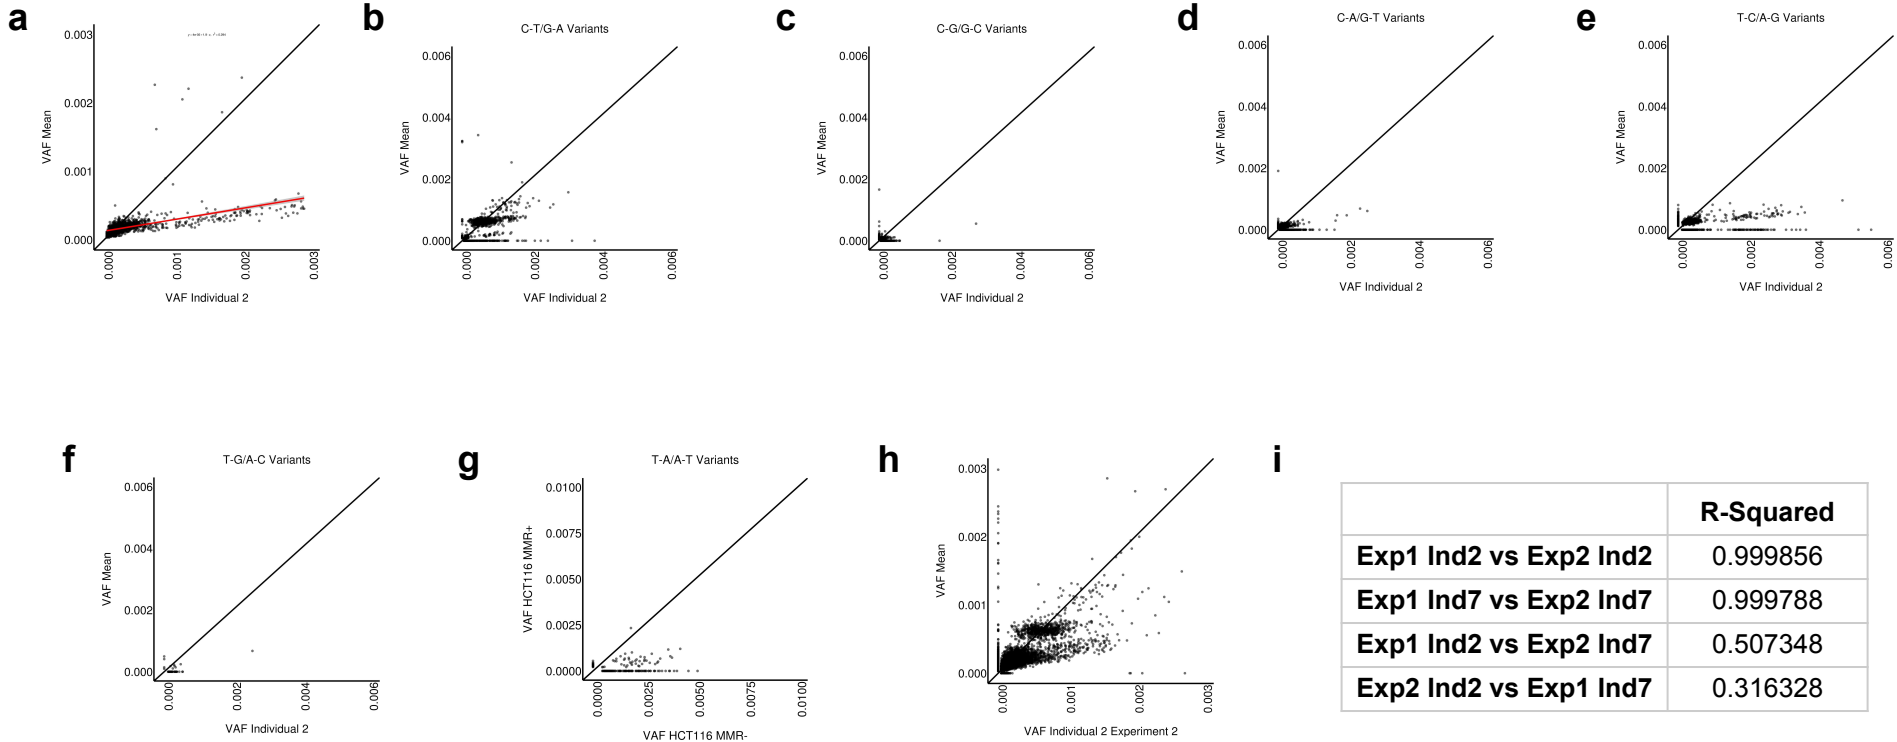

1 **Extended Data Figure 1: Estimation of false-positive rates due to sequencing and**  
2 **PCR errors.**

3 **a**, The use of sequencing information found within Read 1 and Read 2 of paired-end  
4 sequencing is often used to correct sequencing errors. We performed paired-end  
5 collapsing prior to consensus read derivation (Fig. 1a), though the effect was  
6 surprisingly mild. In this table, the number of identified variants are shown when duplex  
7 collapsing is used or not in consensus read derivation (mock duplexing processes the  
8 collapsing in the exact same way as duplex collapsing without eliminating variants for  
9 not being in both reads). These variant counts are shown while also varying the number  
10 of required independent supporting captures for a variant to pass filtering. The logic  
11 behind this analysis is that the fewer captures in which a variant is found, the less  
12 confidence we have that it represents true biological signal. Lower confidence variants  
13 should be more likely to be eliminated by duplex collapsing reads, if other filters were  
14 otherwise insufficient. We show that whether reads are first duplex collapsed or not,  
15 there is little effect on the percent of variants that are eliminated, suggesting that our  
16 other filtering parameters appear to adequately eliminate sequencing errors. **b**, While  
17 the filters used for FERMI should eliminate the majority of errors introduced during PCR  
18 amplification and those errors arising from sequencing mistakes, errors made in the first  
19 round of PCR amplification could be identified as false positives. If there is a sufficient  
20 number of PCR errors made within the first round of amplification, these errors could  
21 create artificial patterns within the data. Using one supporting capture as the lower limit  
22 for variants to be identified as true signal, the expected number of errors were estimated



23 from amplification using Phusion polymerase and are shown in the table (two  
24 estimations are included because Illumina's reaction mixtures are proprietary and we do  
25 not know the exact reaction conditions). **c**, When only requiring one supporting capture,  
26 3-6% of variants should be derived from first round PCR errors, although more than half  
27 of these will be eliminated by the requirement that 55% of reads for a capture support  
28 the variant (errors from subsequent PCR rounds will be even more efficiently eliminated  
29 by the 55% cutoff). If we require that the same variant be present at the same location  
30 across multiple captures before it is included in the final results, it becomes  
31 exponentially more unlikely that a first round PCR error would get included. In contrast,  
32 increased capture number requirements have a much more modest effect on variants  
33 called. **d**, While increasing the number of required supporting captures eliminates rare  
34 variants as well as first round PCR errors, the numbers of identified variants only  
35 decreases modestly for all individuals (blue line, left y-axis). In contrast, the number of  
36 variants expected to be identified as a result of first round PCR amplification errors  
37 exponentially decreases with each extra capture requirement (red line, right y-axis).  
38 When compared to the number of variants that pass all filters and processing, the first  
39 round PCR errors appear to have minimal effect even when only a single capture is  
40 required. Expectedly, as we increase the number of required captures supporting a  
41 variant, the total number of variants also decreases, and after two required captures  
42 should essentially not include mutations created by PCR amplification. Throughout most  
43 of this paper, a single capture is used, so as to not bias results by variant  
44 representation. Nonetheless, the patterns of mutations identified look very similar when

45 greater numbers of supporting captures are required. **e**, As shown in Fig. 1a, when  
46 deriving consensus reads, variants are eliminated for being rarely observed across  
47 reads supporting a given capture. The cutoff we use throughout most of this manuscript  
48 is 55%, such that a given variant must be present in at least 55 percent of sequencing  
49 reads supporting a capture or they are ignored. The logic behind this chosen cutoff is  
50 that more stringent cutoffs largely do not alter the observed mutation spectra, but result  
51 in a significant loss in putatively true positive signal. With this cutoff, the expected  
52 number of sequencing errors can be estimated. We observe that 9 percent of bases are  
53 mismatched within reads supporting a given capture. Each capture is approximately  
54 150bp in length and is supported by an average 13.5 reads. This yields an average of  
55 182.25 errors within each sequenced capture.

$$56 \quad E_{tot} = 0.09 * 150 \text{ bp} * 13.5 \text{ reads}$$

$$57 \quad E_{tot} = 182.25$$

58 Applying the requirements that 55-95 percent of reads must support a given variant  
59 (shown as  $m$ ), the number of false positive signals that pass filtering for each prepared  
60 blood sample can be computed. Within each capture there are approximately 450 total  
61 possible changes, and an average of 18 reads supporting each capture:

$$62 \quad E_{seq} = m * 18 \text{ reads/capture} * \frac{182.5 \text{ PCR err}}{450 \text{ bp}} * 1200000 \text{ captures/sample}$$

$$63 \quad m = 0.55 : E_{seq} = 155.95 \text{ errors/sample}$$

$$64 \quad m = 0.65 : E_{seq} = 31.48 \text{ errors/sample}$$

$$65 \quad m = 0.75 : E_{seq} = 6.19 \text{ errors/sample}$$

$$66 \quad m = 0.85 : E_{seq} = 1.22 \text{ errors/sample}$$

67 
$$m = 0.95 : E_{seq} = 0.24 \text{ errors/sample}$$

68 The number of expected PCR amplification errors to pass all cutoffs is then estimated  
69 using a Gaussian distribution. The logic is that the first round of PCR amplification will  
70 create errors that will be at an allele frequency near 50 percent as an error will be  
71 created in one of two strands of a captured sequence. Using a Gaussian distribution  
72 with a mean at 50, the number of all PCR amplification errors expected to pass the 1  
73 supporting capture and 55-95 percent of sequencing reads criteria can be calculated by  
74 integrating under the Gaussian distribution. Since we expected about 405 first round  
75 PCR amplification errors, and subsequent errors will exist at much smaller allele  
76 frequencies, the expected number of variants expected to pass criteria is calculated as  
77 follows:

78 
$$E_{tot} = 405 * \int_c^{100} f(x) + m_c$$

79 Above we integrate from the support allele frequency  $c$  to  $100$  under the Gaussian  
80 distribution  $f(x)$ , multiply this by the expected total number of first round PCR  
81 amplification errors, and add to this the number of expected sequencing errors  $m$  as a  
82 function of the support frequency  $c$ . As shown here, when variants must be supported  
83 by at least one unique capture and at least 55 percent of supporting reads, we  
84 anticipate only about 150 total variants false variants to make through all FERMI  
85 analysis. We believed this to be an acceptable amount of noise given that we see about  
86 6000 total variants from each sample and generated most of the data in this manuscript  
87 with these criteria.

88 **Extended Data Table 1: Cohort of sequenced individuals.**

89 **a**, This table contains the ages of the individuals used throughout the manuscript, and  
90 their corresponding sample numbers. Those samples shown as age '0' are cord blood  
91 samples that had been previously banked. All other samples were taken from  
92 apparently healthy blood donors that passed the requirements to donate blood. **b**, This  
93 table contains the ages of individuals used to ensure that the data generated by FERMI  
94 was not experiment specific. These samples were used as the comparison to generate  
95 Extended Data Figs. 3a-b.

96 **Extended Data Figure 2: Resequenced samples are not more similar to each other**  
97 **than to other individuals.**

98 **a**, Low frequency variants tend to exist close to a  $y=x$  line, while high frequency SNPs  
99 differ across individuals. As expected, such SNPs cluster around frequencies of 0.5 and  
100 1 (R-Squared=0.243364). **b**, When samples are re-sequenced, they show a high degree  
101 of similarity, both among SNPs and more rare variants (R-squared=0.568749). **c**,  
102 Though repeat sequencing of individuals typically results in close matches of VAF,  
103 repeats do not more closely each other than they match the VAF population mean or  
104 any other typical sample. This suggests that the differences observed between samples  
105 is likely due to sampling differences than to real differences in individual mutation loads.

106 **Extended Data Figure 3: Variants detected represent multiple independent events**  
107 **and reproduce across multiple experiments.**

108 For consistency, all samples used in the main analysis derive from a single bulk library  
109 preparation and sequencing run. To ensure that the observed trends are not the result  
110 of some bias specific to this single preparation, the entire process was independently  
111 repeated, with eleven different blood biopsies (Cohort 2). **a**, Cohort 2 samples closely  
112 resembled averaged allele frequencies from the Cohort 1 (R-squared = 0.455316,  
113 p-value = 0.000000). **b**, Comparing Cohort 2 samples against the VAF mean created  
114 from Cohort 2 samples produces a similar pattern to the same comparison using the  
115 Cohort 1 data (R-Squared = 0.615327, p-value = 0.000000). **c-d**, Similar mutation  
116 patterns along captured regions were observed for Cohort 2 as for cohort #1 (Fig. 2e).  
117 **e**, To understand if observed variant frequencies are the result of clonal expansions or  
118 independent events, heterozygous variants were separated by allele. The logic behind  
119 this analysis is that if independently captured variants result from the same original  
120 event (i.e. a clone), then these variants should be found on the same allele.  
121 Alternatively, if variants result from independent events, then such variants should be  
122 frequently found on both alleles. By following linkage between variants and  
123 heterozygous SNPs, the two alleles can be distinguished. Shown here are the allele  
124 frequencies of variants found on either Allele 1 along the x-axis or Allele 2 along the  
125 y-axis (analyses are restricted to genomic segments from individuals containing  
126 heterozygous SNPs). As the variants adhere to a  $y=x$  line, they appear randomly  
127 distributed between both alleles, suggesting that variants detected represent multiple  
128 independent events rather than clonal expansions.

129 **Extended Data Figure 4: Triplet prevalence in probed regions does not sufficiently**  
130 **explain base bias.**

131 To understand how representative our total captured region was of the overall human  
132 genome, the trinucleotide sequence counts **a**, found within our 32 probes was  
133 compared to **b**, the overall trinucleotide counts found within hg19. CpG sites were less  
134 prevalently mutated in our samples than previously observed in other tissues and  
135 cancers. The lower incidence numbers of CpG mutations does not appear to be due to  
136 any effect of undersampling within our selected probe regions, as shown by **c**, the fold  
137 difference in the number of triplets found in our probed region and in the hg19 reference  
138 genome. Note that these analyses are of total sequence, not identified variants.

139 **Extended Data Figure 5: Multiple positions show nonrandom base bias.**

140 Not only is there significant conservation in the bases to which a position will change  
141 across individuals, but many locations are only observed to mutate to a single base. To  
142 understand the likelihood of this pattern arising due to random chance, every instance  
143 of a given substitution was quantified for each probed site across all individuals. These  
144 changes were used to derive an overall probability that each base would change to any  
145 of the other 3 bases if mutated. Using a chi-squared algorithm to test goodness of fit,  
146 individual probabilities were computed for the base substitution pattern observed at  
147 each base locus. These probabilities were then multi-comparison corrected using  
148 Bonferroni correction, separated by reference base, ordered in descending order, and  
149 plotted here. When a variant was only observed in a small number of individuals, the

150 probability of this change exclusively occurring at a given location due to chance was  
151 relatively high, resulting in a substantial number of non-significant loci (**a-d**; p values  
152 ~1). Plotting only positions exhibiting significant bias reveals a substantial number of  
153 bases that predictably mutate across individuals in a manner unlikely to be explained by  
154 chance (**e-h**; p values that approach zero lack bars). The total number of variants  
155 passing significance for each base are: A) 27 C) 23 G) 51 T) 44. This suggests that  
156 sequence context and base location may both be playing significant roles in determining  
157 the substitution probabilities for a number of base positions throughout the genome.

158 **Extended Data Figure 6: Blood shows previously identified signatures but is**  
159 **different from cancers**

160 **a**, We focused on the amplicons in coding regions, and integrated Pan cancer somatic  
161 mutation data from exome sequencing in the TCGA to analyze patterns of base  
162 substitutions at genomic positions in the target regions which were mutated in both  
163 blood and tumor genomes. Substitution frequency and substitution patterns were both  
164 significantly different between blood and tumors, both at highly mutated sites (mutation  
165 count > 10; Chi square test; FDR adjusted p-value <0.05) and across all such sites  
166 (Mantel test; p-value < 1e-5), with substitution patterns in tumor genomes being more  
167 skewed. It is possible that selection during cancer evolution (as opposed to nearly  
168 neutral evolution in terminally differentiated blood cells) contribute to the observed  
169 patterns. **b**, Integrating trinucleotide contexts of the substitutions, we determined the  
170 contributions of different mutation signatures previously identified. Out of 30 previously

171 identified signatures, our data showed overrepresentation of only 7 of them (Signatures  
172 3, 4, 8, 12, 20, 22 and 30) across different samples. Out of seven signatures, Signature  
173 12, 3 and 4 had maximum contributions. Signature 3 and 4 are known to be associated  
174 with failure of DNA double stranded break repair by homologous repair mechanism and  
175 tobacco mutagens respectively, whereas the aetiology of Signature 12 remains  
176 unknown. **c**, There was no systematic difference in mutation signatures between  
177 amplicons when grouped by their genomic context, and they also showed similar  
178 pattern of enrichment of few signatures as compared to others, with signature 12, 3 and  
179 4 having maximum contributions. Signature 12 and 4 exhibits transcriptional strand bias  
180 for T>C and C>A substitutions respectively, whereas signature 3 is associated with  
181 increased numbers of large InDels.

182 **Extended Data Figure 7: Oncogenic mutations do not show evidence of selection.**

183 As shown in Fig. 2f, known oncogenic mutations within probed regions do not show  
184 evidence of positive selection. Shown here are additional probed oncogenic loci  
185 according to their observed VAFs across donor ages, which also do not show an  
186 increase in variant allele frequency in older ages.

187 **Extended Data Figure 8: MMR<sup>MT</sup> VAFs are elevated over parental frequencies.**

188 When compared to MMR sufficient HCT116 parental cell line genomic DNA, MMR  
189 deficient HCT116 cell DNA (R-Squared = 0.066023) contains substitution mutations at  
190 significantly elevated frequencies, as expected with DNA repair deficiencies (Fig. 3a-b).



191 Although most VAFs appear elevated within MMR deficient cells, the magnitude of  
192 increase was context dependent. Base substitutions altering **a-c)** C or G exhibited  
193 elevated allele frequencies in MMR<sup>MT</sup> cells, but substantially less compared to **d-f)** T or  
194 A nucleotides, which exhibit much higher VAFs compared to parental.

195 **Extended Data Figure 9: Base bias for cord blood individual #2 resembles MMR<sup>MT</sup>**  
196 **Cells.**

197 As for comparisons of MMR<sup>MT</sup> and HCT116 parental cell lines, a cord blood donor  
198 showed a variant population that significantly deviated from expected VAFs (Fig. 3d). **a,**  
199 The mutation spectrum found within individual 2 fits to a linear regression line of  
200  $y=1.9x+0.00004$ , from which it can be seen that variants are approximately twofold  
201 more prevalent than in the overall population average. Similar to the data in Extended  
202 Figure 8, base substitutions altering **b-d)** C or G nucleotides did not show elevated  
203 frequencies. As in the in the MMR<sup>MT</sup> cells, **e-g)** T or A changes appear at elevated  
204 frequencies. Data from individual 19 looked similar to the data shown here, but is not  
205 shown. **h,** To ensure that the increased frequencies of variants are not the result of  
206 some experimental anomaly, the DNA from individuals #19 (not shown) and #2 was  
207 used in a second experiment. In the experimental repeat, the samples showed nearly  
208 identical mutational spectra, with similarly elevated levels of T or A changes. **i,**  
209 Indicative of experimental repeatability, when samples were freshly captured and  
210 sequenced using FERMI, the same individual was highly similar across experiments,  
211 and different individuals were less similar.
